# Supplementary material for: Capturing cell-fate decisions from the molecular signatures of a receptor-dependent signaling response
Source: PubMed Central journal article supplement — Mol Syst Biol. 2007 Dec 4;3:150. doi: 10.1038/msb4100197 (PMC2174630; doi:10.1038/msb4100197), 2007-12-04
Supplement: msb4100197-s1.pdf [file msb4100197-s1.pdf]

## List of Supplementary files

### CAPTURING CELL-FATE DECISIONS FROM THE MOLECULAR SIGNATURES OF A RECEPTOR-DEPENDENT SIGNALING RESPONSE

| <b>Supplementary Data</b> | <b>Title</b>                                                                                                             |
|---------------------------|--------------------------------------------------------------------------------------------------------------------------|
| <b>Figure S1</b>          | <b>Normalization of Western blot data</b>                                                                                |
| <b>Figure S2</b>          | <b>Specific knockdown of signaling intermediates using siRNA</b>                                                         |
| <b>Figure S3-5</b>        | <b>Signaling events downstream of BCR following depletion of specific intermediates</b>                                  |
| <b>Table S6</b>           | <b>List of antibodies used and their target-specificities</b>                                                            |
| <b>Table S7</b>           | <b>Microarray profiling of gene expression in cells depleted of select signaling intermediates</b>                       |
| <b>Figure S8</b>          | <b>Alterations in signal processing influence the structure of gene regulatory networks</b>                              |
| <b>Figure S9</b>          | <b>Key for IPA networks shown in Supplementary Figure S8</b>                                                             |
| <b>Table S10</b>          | <b>VIP list for all the three responses along with their VIP values</b>                                                  |
| <b>Figure S11</b>         | <b>Cross validation of perfect specificity in the model</b>                                                              |
| <b>Table S12</b>          | <b>Effect of pharmacological inhibitors on BCR-dependent signaling</b>                                                   |
| <b>Table S13</b>          | <b>Western Blot Data of all the 21 siRNA condition for each molecule along with replicates</b>                           |
| <b>Table S14</b>          | <b>Table showing the list of siRNA and antibodies used for this study along with their sources and catalogue numbers</b> |
| <b>Table S15</b>          | <b>Data of Microarray experiment</b>                                                                                     |
| <b>Table S16</b>          | <b>Data for the three cellular responses</b>                                                                             |

# Supplementary Figure S1. Normalization of western blot

Syk

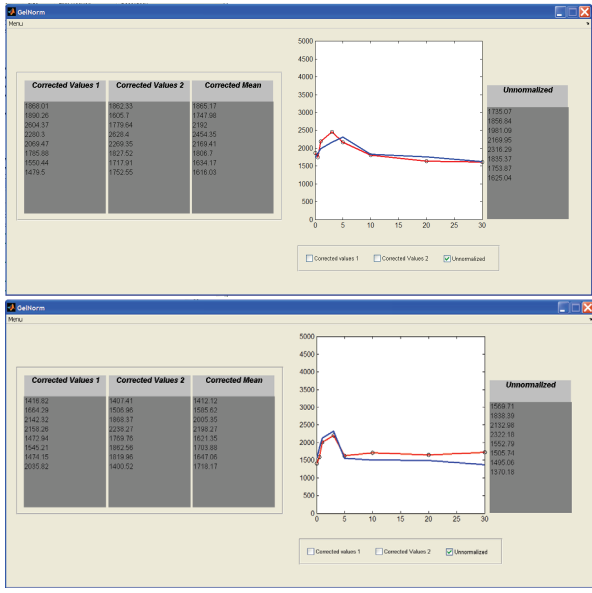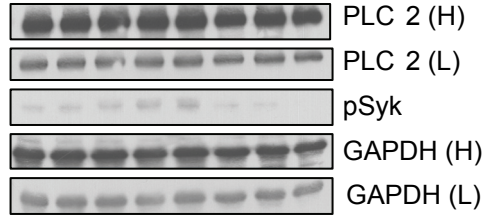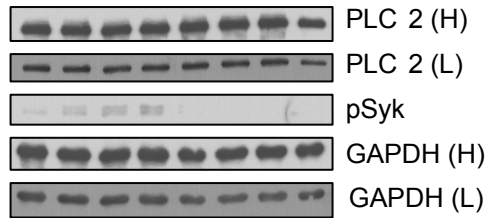

ERK

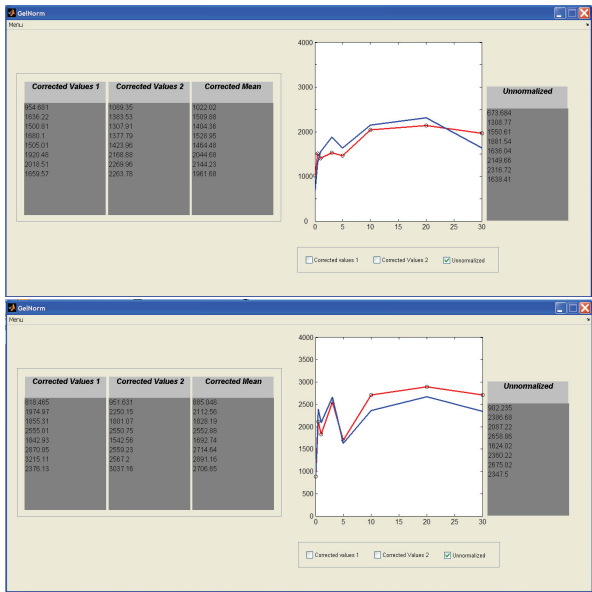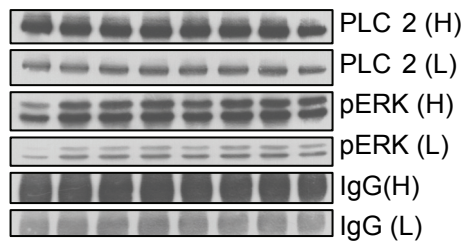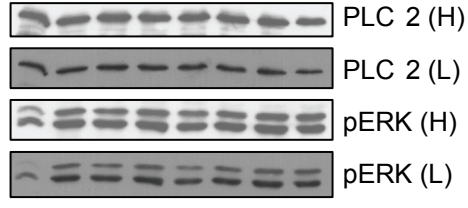

Akt

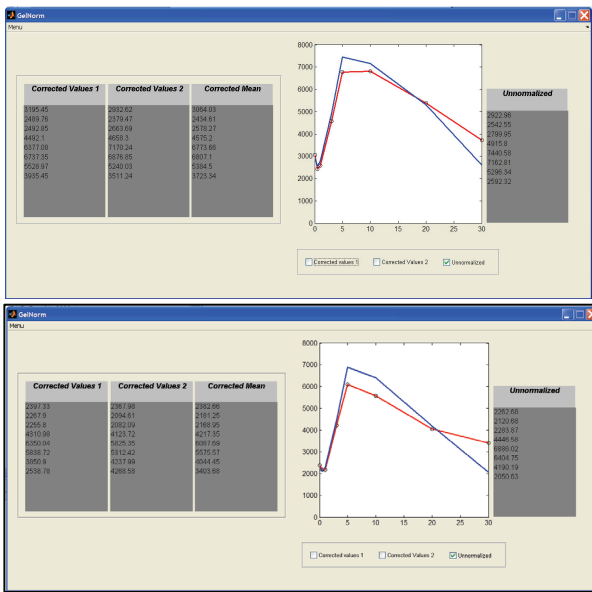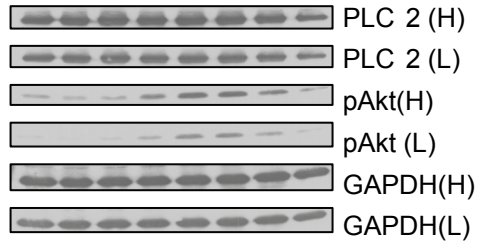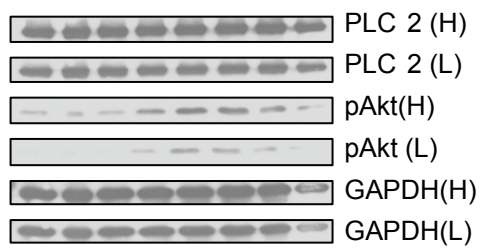

— Raw  
— Normalized

**Normalization of Western blot data.** For the purposes of normalization, each Western blot also included the detection of two additional proteins – whose levels remain unchanged over the course of the experiment – as internal reference standards. In most cases the two molecules were PLC $\gamma$ 2 (as a high molecular mass reference) and GAPDH (as a low molecular mass reference). In the occasional instances where the mass of either of these reference standards coincided with the molecule to be studied, we monitored for the surface IgG receptor of A20 cells as a substitute. Western blots obtained were scanned by PDSI personal densitometer from GE biosciences. Scanning was carried out at 50 pixel resolution and 12 bits. These scanned blots were then quantitated by Molecular Dynamics Imagequant software version 5.2. Numerical values for band intensities thus obtained were then checked for noise versus signal ratio. We were able to extract precise noise to signal ratio since we had different exposure times (low and high) for every blot. The numerical data was then corrected for noise using the calculated ratio. The intensity profile thus generated was then taken into a Toolbox in MATLAB platform developed by us using our own algorithm that normalizes the intensity of specific bands using the two different normalizers (i.e. our reference standards) (manuscript submitted). The variations of the normalizers are captured and the median of these variations is computed as the central reference value. Fluctuations in band intensities of the protein of interest due to errors are calculated by their variations with respect to that of the normalizers and are corrected systematically. Errors in the blots are identified as the deviation of the normalizers from the central reference value and the deviations are removed correspondingly from the data. These normalized values were then further analyzed to calculate changes in phosphorylation level compared to unstimulated

condition (see main text). In a perfect blot concentration of normalizers are supposed to be constant (i.e. without much variations). In our case we fix a reference value  $\mu_i$  (how the concentration of the normalizer would be if there were no errors) for each lane  $i$ . The error function ( $f_i$ ) is the computed error across all lanes due to handling and blotting errors given by.

$$f_i = \frac{\mu_i - n_i}{n_i} P_i$$

where  $\mu_i$  is the reference value for  $n_i$  for each lane.  $n_i$  is the quantified normalizer concentration,  $P_i$  is the quantified concentration of protein of interest,  $i$  being the lane number

The normalized values for  $P_i$  is given by

$$P_i = P_i + f_i$$

The mean of  $P_i$  obtained using both the normalizers gives the final normalized profile.

The extent of noise was determined as the standard deviation of the ratio of band intensities obtained at high and low exposure times of the blots.

$$N_i = \sqrt{\frac{\sum (\frac{H_i}{L_i})^2}{i^2}}$$

The noise reduction step was applied when the standard deviation was more than a threshold value of 0.05 i.e. when  $N_i$  is greater than 0.05. where  $H_i$  and  $L_i$  represent high and low exposure at each time point respectively. Here the low intensity data was decremented by the same ratio for noise reduction, and the new data for normalizers was then used for treating the general profile. The normalized profile data can be stored directly in an excel sheet and all the figures can be stored in any of the standard formats such as JPEG, TIFF etc.

## Supplementary Figure S2: Specific knockdown of signaling intermediates using siRNA.

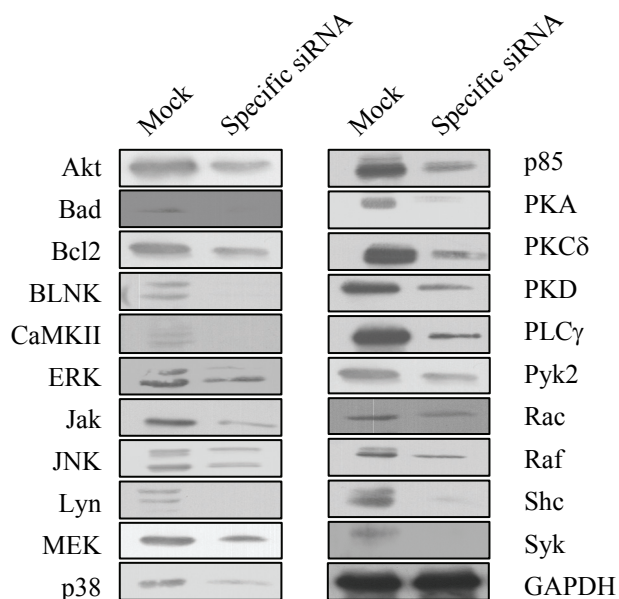

The twenty-one selected signaling molecules were individually depleted by using specific siRNA (Santa Cruz and Dharmacon Inc). We used HiPerfect (Qiagen) reagent for transfection of cells with specific siRNAs and we followed the protocol provided by the manufacturer to silence specific genes in suspension cells. For lanes marked mock, a non-specific siRNA (against GFP) was used. The general efficiency of silencing obtained was 70-90%.

# Supplementary Figure S3-5: Signaling events downstream of BCR following depletion of specific intermediates

## Figure S3

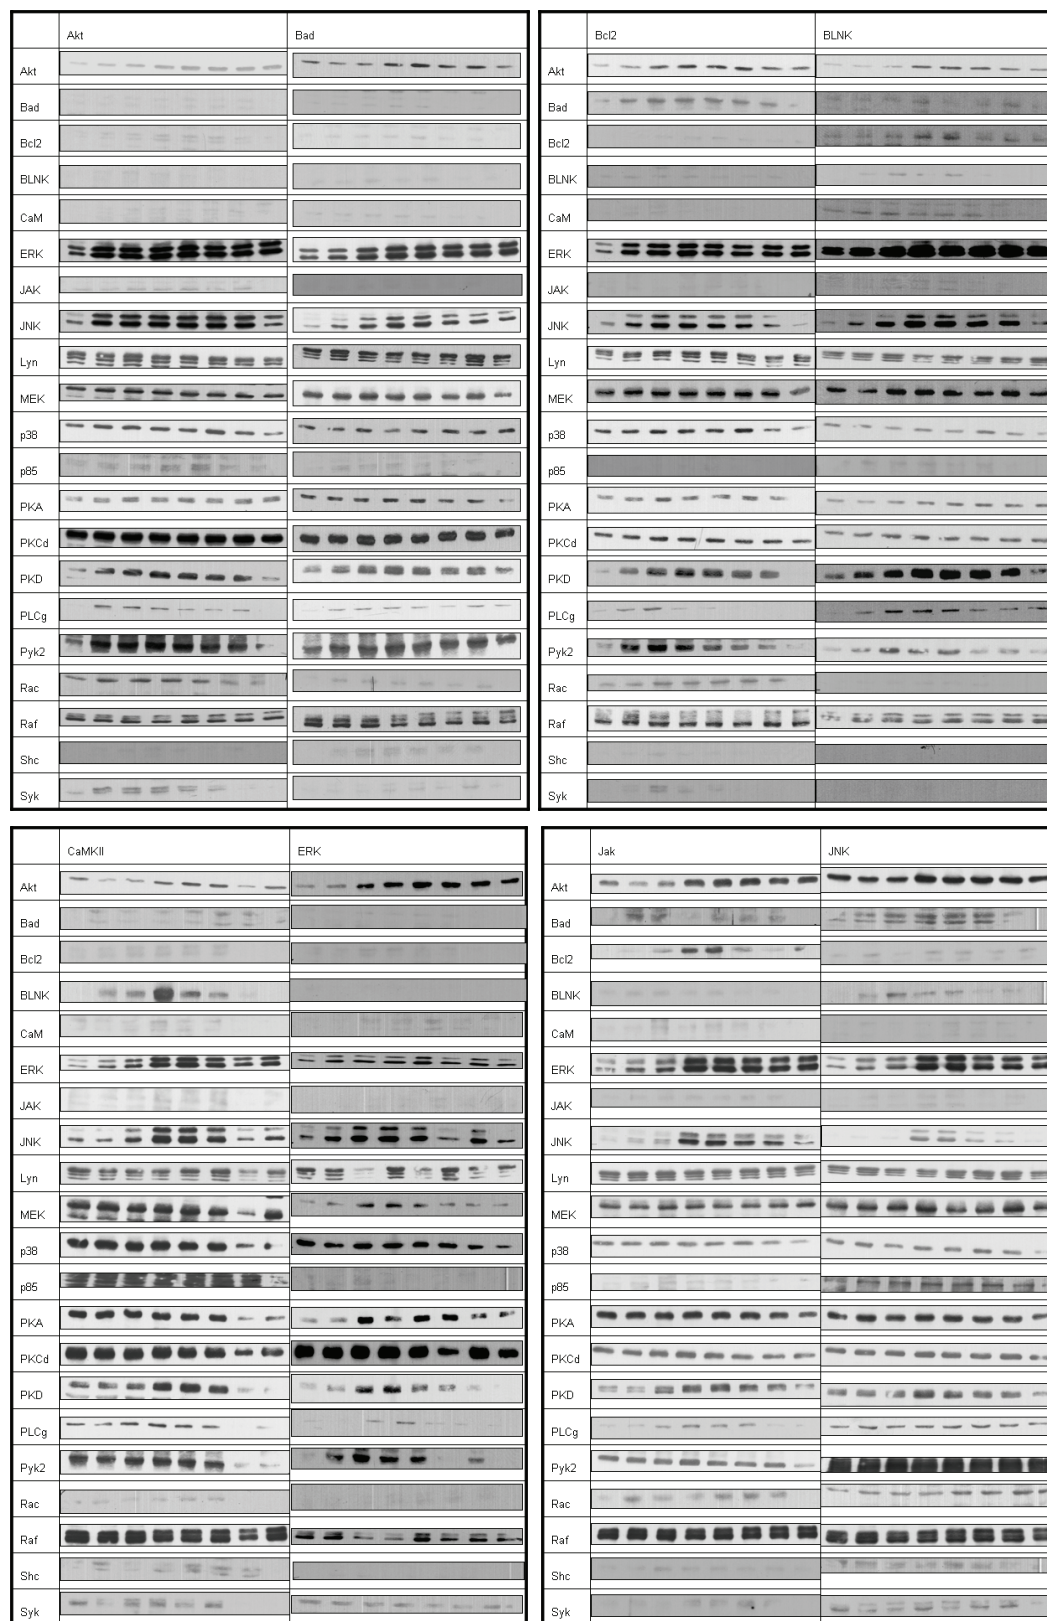

Figure S4

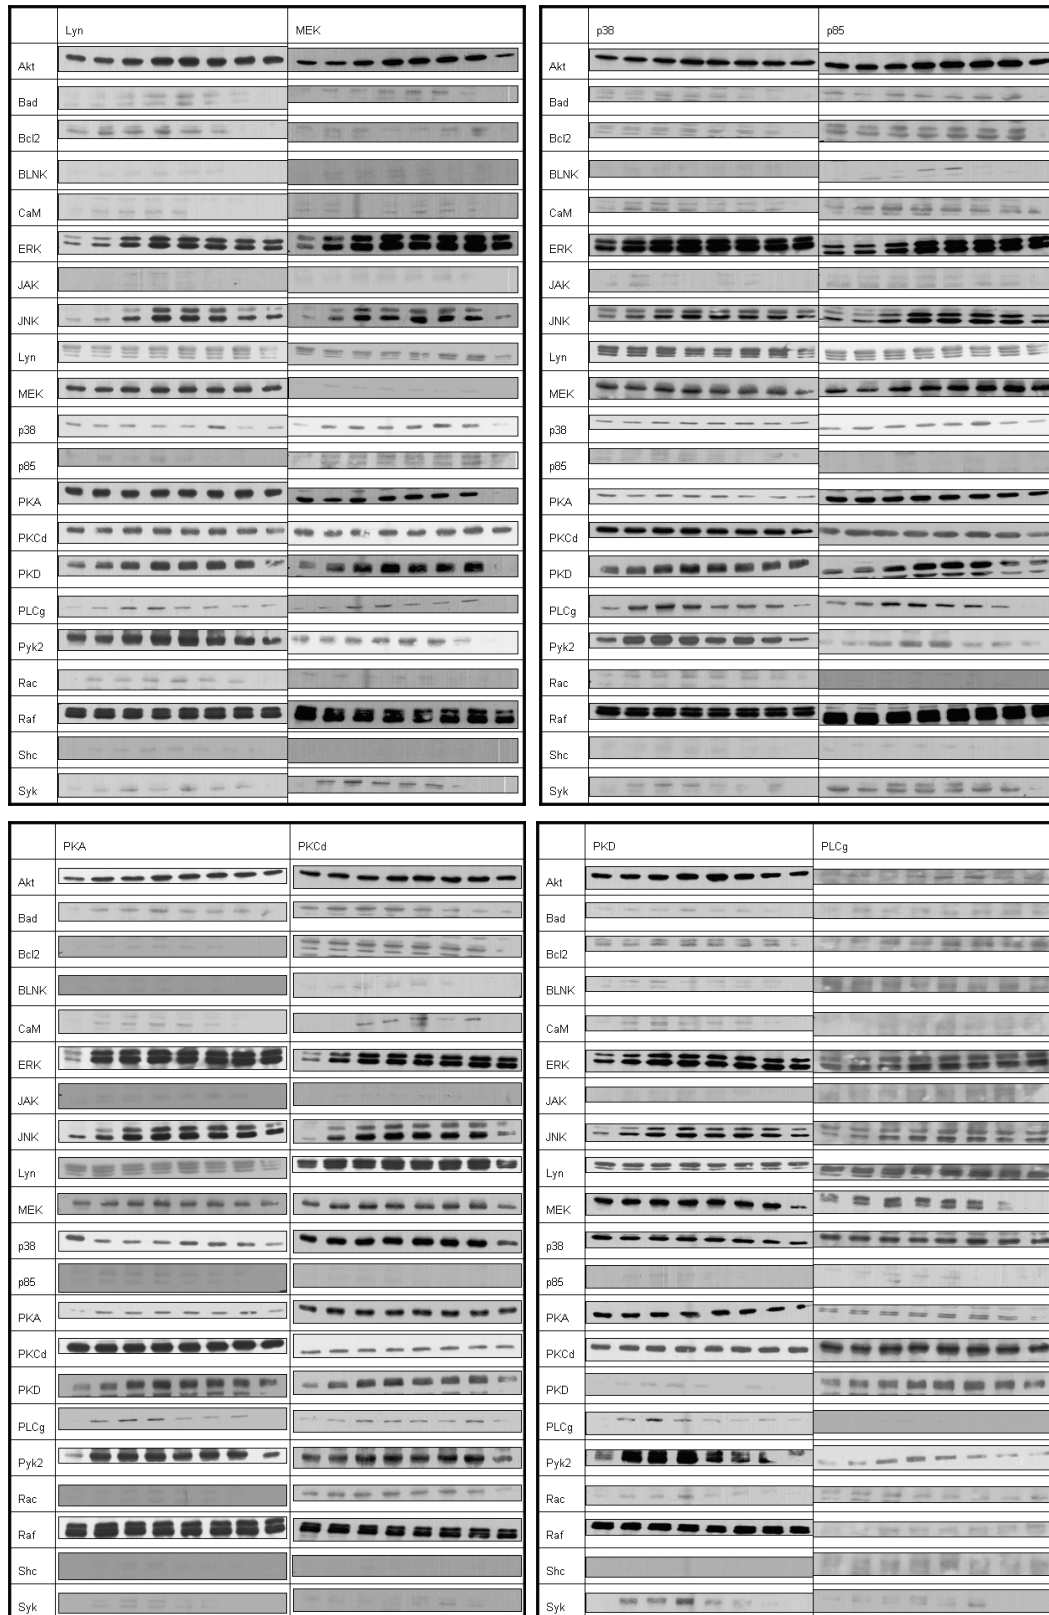



**Figure S5**

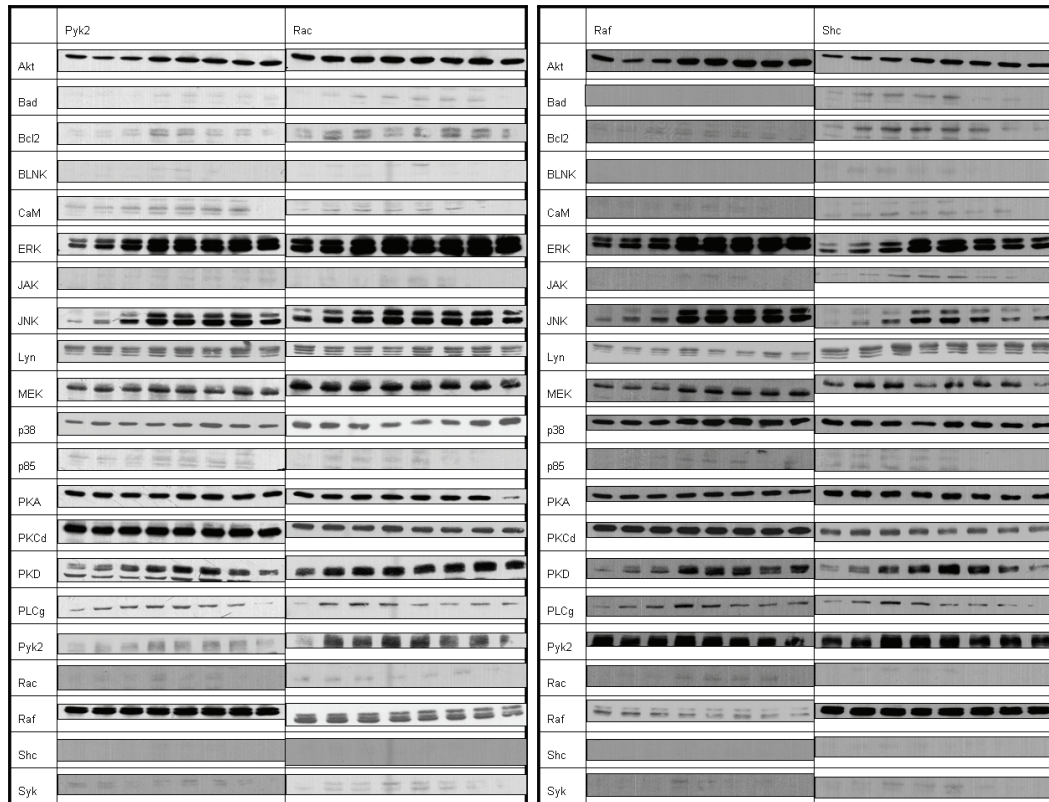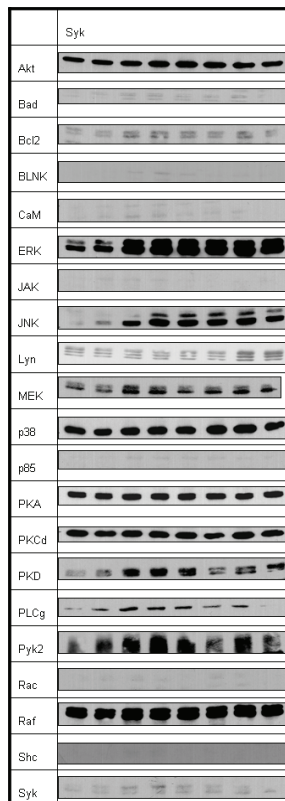

Original scans of Western blots for phosphorylated signaling molecules under all the twenty-one siRNA conditions obtained are shown here. These blots are directly copied from Imagequant. There are a few cases where bands cannot be visualized by the naked eye, due to inhibition in phosphorylation of that molecule. Even in such cases, however, the high sensitivity and resolution of Imagequant allowed for quantitation. In all these latter instances, we confirmed the inhibition of phosphorylation by immunoblotting for the corresponding protein molecule in the same blot, after stripping (following the exact protocol recommended by Cell Signaling Technologies, data not shown). In some instances we also observed phosphorylation of the siRNA-targeted molecule, although these levels very low in comparison with the mock siRNA-treated group. In such cases the basal phosphorylation of that molecule in the siRNA treated group was generally assumed to represent 25% of that obtained for the mock siRNA-treated group, based on the range of silencing observed for the various molecules in Supplementary Figure S2.

### Supplementary Table S6: List of antibodies used and their target specificities

| S.No. | Molecule | Phosphorylation Site | References                                                                                                                                                            |
|-------|----------|----------------------|-----------------------------------------------------------------------------------------------------------------------------------------------------------------------|
| 1     | Akt      | Ser473               | Franke, T. F. (1997) <i>Cell</i> 88, 435-437                                                                                                                          |
| 2     | Bad      | Ser112               | Burgering, B.T. and Coffey, P.J. (1995) <i>Nature</i> 376, 599-602<br>Yang, E. et al. (1995) <i>Cell</i> 80, 285-291<br>Zha, J. et al. (1996) <i>Cell</i> 87, 619-628 |
| 3     | Bcl2     | Ser70                | Murphy, K.M. et al. (2000) <i>Cell death differ.</i> 7, 102-111<br>Zhu, L. et al. (1999) <i>J. Biol. Chem.</i> 274, 33267-33273                                       |
| 4     | Blnk     | Tyr96                | Kurosaki, T. and Tsukada, S. (2000) <i>Imm</i><br>Fu, C. et al. (1998) <i>Immunity</i> 9, 93-103.                                                                     |
| 5     | CamKII   | Thr286               | Hughes, K. et al. (2001) <i>J. Biol. Chem.</i> 276, 36008-36013<br>Barria, A. et al. (1997) <i>Science</i> 276, 2042-2045                                             |
| 6     | ERK      | Thr202/Tyr204        | Marshall, C.J. (1995) <i>Cell</i> 80, 179-185<br>Hunter, T. (1995) <i>Cell</i> 80, 225-236                                                                            |
| 7     | Jak1     | Tyr1022/1023         | Leonard, W.J. and O'Shea, J.J. (1998) <i>Annu. Rev. Immunol.</i> 16, 293-332<br>Darnell, J.E. (1997) <i>Science</i> 277, 1630-1635                                    |
| 8     | Jnk      | Thr183/Tyr185        | Davis, R.J. (1999) <i>Biochem. Soc. Symp.</i> 64, 1-12<br>Ichijo, H. (1999) <i>Oncogene</i> 18, 6087-6093                                                             |
| 9     | Lyn      | Tyr416               | Hunter, T. (1987) <i>Cell</i> 49, 1-4<br>Yamashita, Y. et al. (1991) <i>Science</i> 251, 192-194                                                                      |
| 10    | Mek1/2   | Ser217/221           | Crews, C.M. et al. (1992) <i>Science</i> 258, 478-480<br>Alessi, D.R. et al. (1994) <i>EMBO J.</i> 13, 1610-1619                                                      |
| 11    | p38      | Thr180/Tyr182        | Han, J. et al. (1994) <i>Science</i> 265, 808-811<br>Lee, J.C. et al. (1994) <i>Nature</i> 372, 739-746                                                               |
| 12    | p85      | Tyr 508              | Hayashi et al. (1991) <i>Biochem. J.</i> 280, 769-775<br>Kavanaugh et al. (1992) <i>Mol. Cell Bio.</i> 12, 3415-3424                                                  |
| 13    | PKA C    | Thr197               | Montminy, M. (1997) <i>Annu. Rev. Biochem.</i> 66, 807-822<br>Dell'Acqua, M.L. and Scott, J.E. (1997) <i>J. Biol. Chem.</i> 272, 12881-12884                          |
| 14    | PKCd     | Thr505               | Nishizuka, Y. (1984) <i>Nature</i> 308, 693-698<br>Keranen, L.M. (1995) <i>Curr. Biol.</i> 5, 1394-1403                                                               |
| 15    | PKD      | Ser744/748           | Nishizuka, Y. (1984) <i>Nature</i> 308, 693-698<br>Keranen, L.M. (1995) <i>Curr. Biol.</i> 5, 1394-1403                                                               |
| 16    | Plcg2    | Tyr1217              | Singer, W. D. et al. (1997) <i>Annu. Rev. Biochem.</i> 66, 475-509.<br>Smrcka, A. V. et al. (1991) <i>Science</i> 251, 804-807.                                       |
| 17    | Pyk2     | Tyr402               | Avarham, S. et al. (1995) <i>J. Biol. Chem.</i> 270, 27742-27751<br>Lev, S. et al. (1995) <i>Nature</i> 376, 737-745                                                  |
| 18    | Rac1     | Ser71                | Kwon, T. et al. (2000) <i>J. Biol. Chem.</i> 275, 423-428                                                                                                             |
| 19    | Raf      | Ser259               | Avruch, J. et al. (1994) <i>Trends Biochem. Sci.</i> 19, 279-283<br>Chong, H. et al. (2001) <i>EMBO J.</i> 20, 3716-3727                                              |
| 20    | Shc      | Tyr317               | Pellici, G. et al. (1992) <i>Cell</i> 70, 93-104<br>Migliacciao, E. et al. (1997) <i>EMBO J.</i> 16, 706-716                                                          |
| 21    | Syk      | Tyr352               | Gunterman, C. and Alexander, D.R. (2002) <i>J. Immunol.</i> 168, 4420-4429<br>Shade, A. E. and Levine, A.D. (2002) <i>J. Immunol.</i> 168, 2233-2239.                 |

All the phospho-specific antibodies used in the present study were from Cell Signaling Technologies. The target phosphorylation sites were selected from information available in the literature, and were based on the fact that phosphorylations at these sites have been implicated in the activation/ altered functioning of the corresponding molecule. The table lists the specific antibodies used, along with the relevant references.

**Supplementary Table S7: Microarray profiling of gene expression in cells depleted of select signaling intermediates**

| Gene      | Nor | CaMKII | PKCδ | PLCγ | Pyk2 | Gene       | Nor | CaMKII | PKCδ | PLCγ | Pyk2 |
|-----------|-----|--------|------|------|------|------------|-----|--------|------|------|------|
| *Egr1*    | 2.8 | 3.0    | 3.1  | 2.8  | 3.0  | *Cita*     | 0.0 | 0.9    | 1.0  | 0.0  | 0.0  |
| *Egr2*    | 1.9 | 2.1    | 2.1  | 1.8  | 2.2  | *A530089I  | 0.0 | 0.0    | 1.0  | 0.0  | 0.0  |
| *Nrkbiz2* | 1.8 | 1.8    | 1.5  | 1.9  | 1.6  | *1810011C  | 0.0 | 0.8    | 1.0  | 0.0  | 0.0  |
| *Cd83*    | 1.8 | 2.0    | 1.4  | 1.8  | 1.6  | *Strn3*    | 0.0 | 0.7    | 1.0  | 0.0  | 0.0  |
| *Traff1*  | 1.5 | 1.4    | 1.1  | 1.4  | 1.1  | *Id1*      | 0.0 | 0.8    | 1.0  | 0.0  | 0.0  |
| *Fos*     | 1.4 | 1.4    | 0.0  | 1.0  | 1.4  | *AA95974I  | 0.0 | 0.8    | 1.0  | 0.0  | 0.0  |
| *4930431B | 1.5 | 1.3    | 1.0  | 1.4  | 1.3  | *Cena4*    | 0.0 | 0.0    | 1.0  | 0.0  | 0.0  |
| *Irf1*    | 1.4 | 1.4    | 1.0  | 1.5  | 1.1  | *Ssf1*     | 0.0 | 0.6    | 1.0  | 0.0  | 0.0  |
| *Tnfrap3* | 1.3 | 1.6    | 1.3  | 1.3  | 1.3  | *BC02388I  | 0.0 | 0.7    | 1.0  | 0.0  | 0.0  |
| *Nrkbia*  | 1.0 | 2.1    | 1.5  | 1.1  | 1.2  | *Cena2*    | 0.0 | 0.0    | 1.0  | 0.0  | 0.0  |
| *Cdkn2b*  | 1.3 | 1.3    | 1.1  | 1.2  | 0.0  | *Acs14*    | 0.0 | 1.0    | 1.0  | 0.0  | 0.0  |
| *BC02453I | 1.3 | 0.8    | 0.0  | 1.0  | 1.3  | *2900064A  | 0.0 | 0.8    | 1.0  | 0.0  | 0.0  |
| *AY07806I | 1.1 | 1.2    | 0.0  | 1.2  | 1.2  | *Ywhaz*    | 0.0 | 0.0    | 1.0  | 0.0  | 0.0  |
| *Bhlhe2*  | 1.0 | 1.2    | 1.1  | 1.3  | 1.3  | *Uba2*     | 0.0 | 0.0    | 1.0  | 0.0  | 0.0  |
| *C669*    | 1.2 | 1.1    | 0.0  | 0.0  | 1.1  | *Ndufv2*   | 0.0 | 0.7    | 1.0  | 0.0  | 0.0  |
| *Mmp10*   | 1.0 | 0.0    | 0.0  | 0.0  | 0.0  | *Sns5*     | 0.0 | 0.9    | 1.0  | 0.0  | 0.0  |
| *Nfatc1*  | 1.0 | 0.9    | 0.0  | 1.2  | 1.0  | *Sdfr1*    | 0.0 | 0.7    | 1.0  | 0.0  | 0.0  |
| *Pbef1*   | 1.0 | 1.0    | 1.0  | 0.0  | 0.0  | *E130112E  | 0.0 | 0.9    | 1.0  | 0.0  | 0.0  |
| *Junb*    | 1.0 | 1.1    | 1.2  | 1.5  | 1.0  | *Morf411*  | 0.0 | 0.0    | 1.0  | 0.0  | 0.0  |
| *LOC3811* | 1.0 | 0.9    | 0.0  | 1.3  | 1.1  | *Paip2*    | 0.0 | 0.0    | 1.0  | 0.0  | 0.0  |
| *Nrkbie*  | 1.0 | 0.0    | 0.0  | 0.0  | 0.0  | *Nup88*    | 0.0 | 1.0    | 1.0  | 0.0  | -1.1 |
| *Irf4*    | 0.0 | 0.0    | 1.0  | 1.2  | 0.0  | *Rbm14*    | 0.0 | 0.9    | 1.0  | 0.0  | 0.0  |
| *Myc*     | 0.0 | 0.0    | 0.0  | 1.0  | 0.0  | *Arnt*     | 0.0 | 0.0    | 1.0  | 0.0  | 0.0  |
| *Dusp2*   | 0.0 | 1.1    | 1.0  | 1.0  | 0.0  | *1110017C  | 0.0 | 0.8    | 1.0  | 0.0  | 0.0  |
| *Rabgef1* | 0.0 | 0.0    | 0.0  | 1.0  | 0.0  | *Ga17*     | 0.0 | 0.8    | 1.0  | 0.0  | 0.0  |
| *Gdap10*  | 0.0 | 1.2    | 1.0  | 1.0  | 1.1  | *Atrbk1*   | 0.0 | 0.0    | 1.0  | 0.0  | 0.0  |
| *LOC2447  | 0.0 | 0.9    | 1.0  | -1.0 | 0.0  | *Trip12*   | 0.0 | 0.0    | 1.0  | 0.0  | 0.0  |
| *LOC2417* | 0.0 | 0.9    | 0.0  | -1.0 | 0.0  | *LOC2365   | 0.0 | 0.8    | 1.0  | 0.0  | 0.0  |
| *Ccl5*    | 0.0 | 0.7    | 0.0  | -1.0 | 0.0  | *Ddx39*    | 0.0 | 0.8    | 1.0  | 0.0  | 0.0  |
| *LOC2147* | 0.0 | 0.9    | 1.0  | -1.0 | 0.0  | *Bmyc*     | 0.0 | 0.0    | 1.0  | 0.0  | 0.0  |
| *Atp5a1*  | 0.0 | 0.0    | 1.0  | -1.0 | 0.0  | *LOC22346* | 0.0 | 0.0    | 1.0  | 0.0  | 0.0  |
| *Ddx3x*   | 0.0 | 0.0    | 1.0  | -1.0 | 0.0  | *Cd24*     | 0.0 | 0.7    | 1.0  | 0.0  | 0.0  |
| *Mdh2*    | 0.0 | 0.9    | 0.0  | -1.0 | 0.0  | *LOC3820*  | 0.0 | 0.9    | 1.0  | 0.0  | 0.0  |
| *LOC3845* | 0.0 | 0.0    | 1.0  | -1.0 | 0.0  | *LOC2076*  | 0.0 | 0.0    | 1.0  | 0.0  | 0.0  |
| *Ureb1*   | 0.0 | 0.0    | 0.0  | -1.0 | 0.0  | *LOC3812*  | 0.0 | 1.0    | 1.0  | 0.0  | 0.0  |
| *2610041F | 0.0 | 0.0    | 0.0  | -1.0 | 0.0  | *Eif3s8*   | 0.0 | 0.8    | 1.0  | 0.0  | 0.0  |
| *Abcd3*   | 0.0 | 0.0    | 0.0  | -1.0 | 0.0  | *LOC3865i  | 0.0 | 0.0    | 1.0  | 0.0  | 0.0  |
| *H3f3a*   | 0.0 | 0.0    | 0.0  | -1.0 | 0.0  | *LOC3818*  | 0.0 | 0.0    | 1.0  | 0.0  | 0.0  |
| *Hmipa2b1 | 0.0 | 0.6    | 1.0  | -1.0 | 0.0  | *Cdk5r1*   | 0.0 | 1.1    | 0.0  | 0.0  | 0.0  |
| *Dlx1*    | 0.0 | 0.0    | 1.0  | -1.0 | 0.0  | *Rpl36al*  | 0.0 | 0.9    | 0.0  | 0.0  | 0.0  |
| *Ndufb4*  | 0.0 | 1.0    | 0.0  | -1.0 | 0.0  | *Tuba1*    | 0.0 | 0.9    | 0.0  | 0.0  | 0.0  |
| *Mrpl13*  | 0.0 | 0.0    | 0.0  | -1.0 | 0.0  | *LOC3815*  | 0.0 | 0.8    | 0.0  | 0.0  | 0.0  |
| *Ciss*    | 0.0 | 0.0    | 0.0  | -1.0 | 0.0  | *2610511C  | 0.0 | 0.8    | 0.0  | 0.0  | 0.0  |
| *Kpna3*   | 0.0 | 0.0    | 0.0  | -1.0 | 0.0  | *LOC2456*  | 0.0 | 0.7    | 0.0  | 0.0  | 0.0  |
| *Hspa5*   | 0.0 | 1.2    | 1.0  | -1.0 | 0.0  | *2900010J  | 0.0 | 0.8    | 0.0  | 0.0  | 0.0  |
| *1810030A | 0.0 | 0.0    | 1.0  | -1.0 | 0.0  | *2610205I  | 0.0 | 0.8    | 0.0  | 0.0  | 0.0  |
| *Calml2*  | 0.0 | 0.8    | 1.0  | -1.0 | 0.0  | *Hnpu*     | 0.0 | 0.7    | 0.0  | 0.0  | 0.0  |
| *Cryz1*   | 0.0 | 0.0    | 0.0  | -1.0 | 0.0  | *Hprt*     | 0.0 | 0.8    | 0.0  | 0.0  | 0.0  |
| *Usmg5*   | 0.0 | 1.1    | 1.0  | -1.0 | 0.0  | *3300001A  | 0.0 | 0.7    | 0.0  | 0.0  | 0.0  |
| *Igfk-V1* | 0.0 | 1.0    | 1.0  | -1.0 | 0.0  | *ldb2*     | 0.0 | 0.8    | 0.0  | 0.0  | 0.0  |
| *Bcat1*   | 0.0 | 0.9    | 1.0  | -1.0 | 0.0  | *Slc11a1*  | 0.0 | 0.7    | 0.0  | 0.0  | 0.0  |
| *Ube2e1*  | 0.0 | 0.0    | 1.0  | -1.0 | 0.0  | *Thy28*    | 0.0 | 0.8    | 0.0  | 0.0  | 0.0  |
| *Fin14*   | 0.0 | 0.8    | 1.0  | -1.0 | 0.0  | *Copb1*    | 0.0 | 0.7    | 0.0  | 0.0  | 0.0  |
| *Hmgbl1*  | 0.0 | 1.1    | 1.0  | -1.0 | -1.0 | *3110001A  | 0.0 | 0.7    | 0.0  | 0.0  | 0.0  |
| *Ppp1cc*  | 0.0 | 0.0    | 0.0  | -1.0 | 0.0  | *Gnb2-rs1* | 0.0 | 0.7    | 0.0  | 0.0  | 0.0  |
| *Ndufa5*  | 0.0 | 0.7    | 0.0  | -1.0 | 0.0  | *D11Mch3   | 0.0 | 0.8    | 0.0  | 0.0  | 0.0  |
| *Cspg6*   | 0.0 | 0.0    | 1.0  | -1.0 | 0.0  | *Slc15a3*  | 0.0 | 0.7    | 0.0  | 0.0  | 0.0  |
| *Rps6*    | 0.0 | 0.9    | 1.0  | -1.0 | 0.0  | *Smu1*     | 0.0 | 0.7    | 0.0  | 0.0  | 0.0  |
| *Prg*     | 0.0 | 1.4    | 1.0  | -1.0 | 0.0  | *D19Etd7I  | 0.0 | 0.7    | 0.0  | 0.0  | 0.0  |
| *Eif4g2*  | 0.0 | 0.8    | 1.0  | -1.0 | 0.0  | *Birc3*    | 0.0 | 0.7    | 0.0  | 0.0  | 0.0  |
| *Nono*    | 0.0 | 0.8    | 0.0  | -1.0 | 0.0  | *LOC3850*  | 0.0 | 0.0    | 0.0  | 0.0  | 1.8  |
| *Cyflp2*  | 0.0 | 0.0    | 0.0  | -1.0 | 0.0  | *Prpl8*    | 0.0 | 0.0    | 0.0  | 0.0  | 1.2  |
| *LOC2804* | 0.0 | 0.6    | 0.0  | -1.0 | 0.0  | *2610510C  | 0.0 | 0.0    | 0.0  | 0.0  | 1.2  |
| *Anp32a*  | 0.0 | 0.0    | 0.0  | -1.0 | 0.0  | *LOC3850i  | 0.0 | 0.0    | 0.0  | 0.0  | 1.2  |
| *Ndufa5*  | 0.0 | 0.8    | 0.0  | -1.0 | 0.0  | *Otrn87*   | 0.0 | 0.0    | 0.0  | 0.0  | 1.6  |
| *Slc25a4* | 0.0 | 1.0    | 1.0  | -1.0 | 0.0  | *Pigt*     | 0.0 | 0.0    | 0.0  | 0.0  | 1.1  |
| *D11Etd6I | 0.0 | 0.0    | 0.0  | -1.0 | 0.0  | *Slc16a6*  | 0.0 | 0.0    | 0.0  | 0.0  | 1.0  |
| *Vbp1*    | 0.0 | 0.0    | 0.0  | -1.0 | 0.0  | *Blr1*     | 0.0 | 0.0    | 0.0  | 0.0  | 1.1  |
| *Psmc14*  | 0.0 | 0      | 0.0  | -1.0 | 0.0  | *Ube4a*    | 0.0 | 0.0    | 0.0  | 0.0  | 1.1  |
| *Atp5f*   | 0.0 | 1.1    | 1.0  | -1.0 | 0.0  | *Got2*     | 0.0 | 0.0    | 0.0  | 0.0  | 1.1  |
| *Slc3a2*  | 0.0 | 1.0    | 1.0  | -1.0 | -1.2 | *LOC3860*  | 0.0 | 0.0    | 0.0  | 0.0  | 1.0  |
| *Vdac3*   | 0.0 | 0.8    | 1.0  | -1.0 | -1.2 | *Bcl2l1*   | 0.0 | 0.0    | 0.0  | 0.0  | 1.0  |
| *1111005A | 0.0 | 0.0    | 1.0  | -1.0 | 0.0  | *Pim1*     | 0.0 | 0.0    | 0.0  | 0.0  | 1.1  |
| *Strn1*   | 0.0 | 0.8    | 0.0  | -1.0 | 0.0  | *Eef2*     | 0.0 | 0.0    | 0.0  | 0.0  | 1.0  |
| *Atp5k*   | 0.0 | 1.3    | 1.0  | -1.0 | 0.0  | *Slc4a7*   | 0.0 | 0.0    | 0.0  | 0.0  | 3.0  |
| *Hmgn2*   | 0.0 | 1.2    | 1.0  | -1.0 | -1.1 | *2610305J  | 0.0 | 0.0    | 0.0  | 0.0  | 1.0  |
| *Top1*    | 0.0 | 0.0    | 1.0  | -1.0 | 0.0  | *Csnk2a1-I | 0.0 | 0.0    | 0.0  | 0.0  | 1.0  |
| *Pcna*    | 0.0 | 1.1    | 1.0  | -1.0 | -1.4 | *Ide*      | 0.0 | 0.0    | 0.0  | 0.0  | 1.0  |
| *Rpl30*   | 0.0 | 1.1    | 1.0  | -1.0 | -1.0 | *Vars2*    | 0.0 | 0.0    | 0.0  | 0.0  | 1.0  |
| *LOC2358I | 0.0 | 0.0    | 0.0  | -1.0 | 0.0  | *Raly*     | 0.0 | 0.0    | 0.0  | 0.0  | 1.0  |
| *mi-N64I  | 0.0 | 0.9    | 1.0  | -1.0 | -1.0 | *Zfp162*   | 0.0 | 0.0    | 0.0  | 0.0  | 1.0  |
| *AY07806I | 0.0 | 0.0    | 1.2  | 0.0  | 0.0  | *Hnpgk*    | 0.0 | 0.0    | 0.0  | 0.0  | 1.0  |
| *Cox7b*   | 0.0 | 0.9    | 1.0  | 0.0  | 0.0  | *Fosb*     | 0.0 | 0.0    | 0.0  | 0.0  | 1.0  |
| *Tdg*     | 0.0 | 0.6    | 1.0  | 0.0  | 0.0  | *LOC3821i  | 0.0 | 0.0    | 0.0  | 0.0  | 1.0  |
| *Twistnb* | 0.0 | 0.0    | 1.0  | 0.0  | 0.0  | *Cdkn2a*   | 0.0 | 0.0    | 0.0  | 0.0  | 1.0  |
| *H2-Aa*   | 0.0 | 0.9    | 1.0  | 0.0  | 0.0  | *Insig1*   | 0.0 | 0.0    | 0.0  | 0.0  | 1.0  |
| *Rpo1-3*  | 0.0 | 0.0    | 1.0  | 0.0  | 0.0  | *1810008K  | 0.0 | 0.0    | 0.0  | 0.0  | -1.0 |
| *Map2k1*  | 0.0 | 0.0    | 1.0  | 0.0  | 0.0  |            |     |        |      |      |      |
| *Pnpr1*   | 0.0 | 0.0    | 1.0  | 0.0  | 0.0  |            |     |        |      |      |      |

The table here shows comparative expression levels of genes regulated, in an anti-IgG-dependent manner, under the various siRNA treatment conditions indicated. Only changes of the order of at least 2-fold in all the three individual experiments are shown here, with a 2-fold variation being quantified as 1.



We illustrate here how the perturbation-induced alterations in gene expression affect the Myc-centric gene regulatory module identified as the most significant by an IPA analysis. Those genes that are common between the components of this Myc-centric network and our gene list are marked in bold. Upregulated genes are marked in red, whereas the downregulated ones are in green. The first five networks shown (from left to right and starting from the top set of panels) correspond to results from cells treated either with mock, CaMKII, PKC $\delta$ , PLC $\gamma$ , or Pyk2 specific siRNA respectively. The last panel (i.e. lower right panel) presents a summary of the comparative regulation of these Myc-centric network constituents, under these various perturbation conditions (depicted in the form of either red or green bars). The symbol code describing the role of each of the nodes of the network is listed in Supplementary Figure S9.



Supplementary Figure S9. Key for IPA network shown in Supplementary Figure S8.

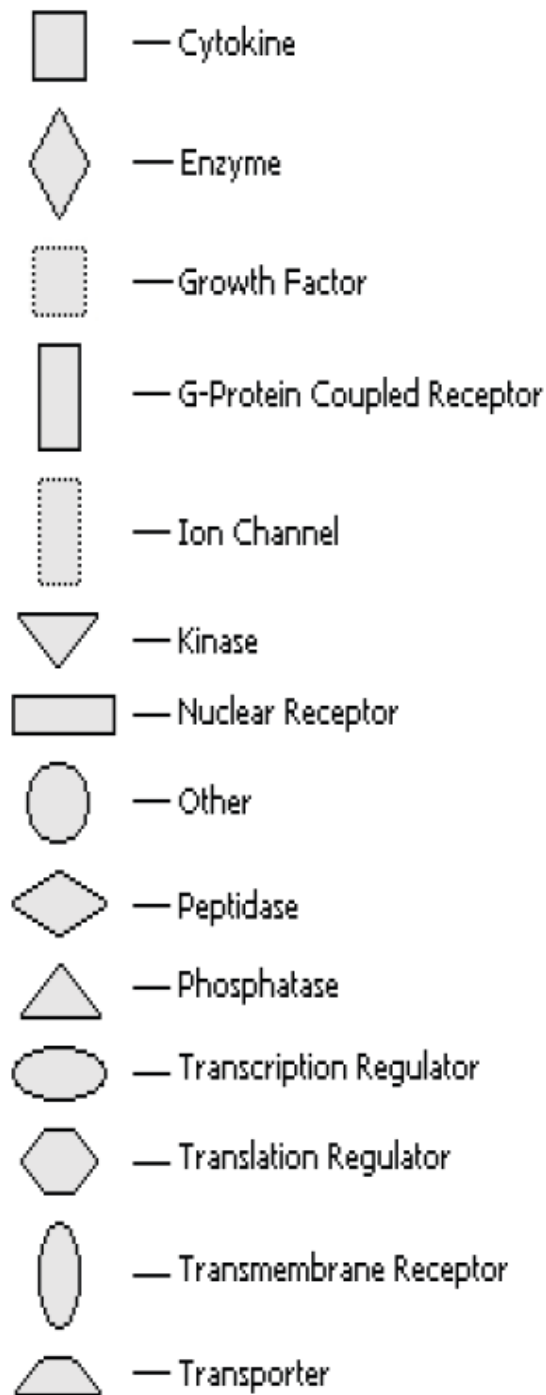

**Supplementary Table S10: VIP list for all the three responses along with their VIP values**

| Apoptosis        |           | Proliferation                 |           | Cytokine secretion |           |
|------------------|-----------|-------------------------------|-----------|--------------------|-----------|
| Var ID (Primary) | M1.VIP[3] | Var ID (Primary)              | M2.VIP[7] | Var ID (Primary)   | M3.VIP[1] |
| Smax/TmaxMEK     | 2.46514   | Smax/Tmaxp85 decay rateCamKII | 1.91071   | Smax/TmaxaxRaf     | 2.28487   |
| AreaPKA          | 2.0061    | Smax/TmaxaxBLNK               | 1.79613   | Smax/Tmaxaxbad     | 1.88832   |
| Smax/Tmaxax akt  | 1.73551   | Smax/TmaxaxERK                | 1.73539   | Smax/Tmaxaxp85     | 1.7457    |
| decay rateBLNK   | 1.59498   | Smax/TmaxaxERK                | 1.51895   | AreaMEK            | 1.695     |
| Smax/TmaxaxERK   | 1.48704   | Smax/TmaxaxCamKII             | 1.49441   | decay rateRaf      | 1.66106   |
| Smax/Tmaxaxbad   | 1.44208   | Smax/TmaxaxJAK                | 1.47289   | Smax/TmaxaxShc     | 1.50897   |
| Smax/TmaxaxSyk   | 1.41977   | AreaSyk                       | 1.40183   | decay rateCamKII   | 1.4791    |
| AreaMEK          | 1.3776    | AreaCamKII                    | 1.36675   | decay rateBcl2     | 1.43936   |
| Smax/TmaxaxPKD   | 1.34317   | Smax/TmaxaxMEK                | 1.3282    | decay rateMEK      | 1.43019   |
| decay ratep38    | 1.31144   | AreaMEK                       | 1.27702   | AreaAkt            | 1.41659   |
| AreaSyk          | 1.22515   | decay rateBLNK                | 1.26634   | AreaBLNK           | 1.41098   |
| decay rateMEK    | 1.21238   | decay rateSyk                 | 1.26202   | decay rateShc      | 1.38739   |
| AreaPKCd         | 1.20422   | AreaRac                       | 1.14695   | AreaPKCd           | 1.313     |
| AreaCamKII       | 1.19413   | AreaPKA                       | 1.11748   | Smax/TmaxaxCamKII  | 1.28783   |
| decay rateSyk    | 1.13659   | decay rateMEK                 | 1.11396   | AreaBcl2           | 1.20298   |
| Smax/TmaxaxPLCg  | 1.12537   | AreaAkt                       | 1.08479   | Smax/TmaxaxBLNK    | 1.19394   |
| decay rateBcl2   | 1.11287   | Smax/TmaxaxRaf                | 1.07696   | AreaRaf            | 1.17237   |
| Smax/TmaxaxJAK   | 1.07853   | Smax/Tmaxax akt               | 1.07518   | AreaERK            | 1.16452   |
| AreaPKD          | 1.02025   | Smax/TmaxaxPKCd               | 1.06619   | decay rateakt      | 1.11286   |

| Apoptosis               |          | Proliferation     |          | Cytokine secretion |          |
|-------------------------|----------|-------------------|----------|--------------------|----------|
| AreaBcl2                | 0.999468 | decay<br>ratePKCd | 1.06018  | Area Bad           | 1.09796  |
| Smax/Tm<br>axCamKII     | 0.988285 | decay<br>rateLyn  | 1.02981  | AreaShc            | 1.09017  |
| Smax/Tm<br>axRac        | 0.985342 | decay<br>ratePKD  | 1.02105  | AreaSyk            | 1.08216  |
| AreaBLN<br>K            | 0.952724 | AreaRaf           | 1.01305  | Smax/Tm<br>axp38   | 1.07873  |
| Smax/Tm<br>axBcl2       | 0.940998 | decay<br>rateERK  | 1.00817  | Smax/Tm<br>axMEK   | 1.00652  |
| Smax/Tm<br>axPKCd       | 0.922208 | decay<br>ratePLCg | 0.993274 | Smax/Tm<br>axSyk   | 1.00007  |
| Smax/Tm<br>axShc        | 0.907987 | decay<br>rateRaf  | 0.967541 | decay<br>ratePLCg  | 0.988653 |
| Smax/Tm<br>axp85        | 0.901258 | decay<br>rateBcl2 | 0.962886 | Smax/Tm<br>axPKD   | 0.954391 |
| decay<br>rateRaf        | 0.888888 | Smax/Tm<br>axPyk2 | 0.942134 | Smax/Tm<br>axLyn   | 0.932847 |
| decay<br>ratePKCd       | 0.876847 | AreaBcl2          | 0.902031 | Smax/Tm<br>axJAK   | 0.930831 |
| decay<br>rateRac        | 0.870724 | Smax/Tm<br>axBcl2 | 0.887065 | AreaJAK            | 0.91249  |
| decay<br>rateERK        | 0.869312 | decay<br>ratep38  | 0.876692 | Smax/Tm<br>ax akt  | 0.899781 |
| AreaAkt                 | 0.85503  | Smax/Tm<br>axbad  | 0.86887  | Smax/Tm<br>axPyk2  | 0.85852  |
| Smax/Tm<br>axBLNK       | 0.851156 | AreaPyk2          | 0.862688 | AreaRac            | 0.8389   |
| Smax/Tm<br>axJNK        | 0.850748 | Smax/Tm<br>axShc  | 0.861903 | decay<br>rateERK   | 0.822477 |
| AreaRaf                 | 0.842655 | Smax/Tm<br>axSyk  | 0.853338 | Smax/Tm<br>axPLCg  | 0.81799  |
| AreaShc                 | 0.833707 | AreaBLN<br>K      | 0.842106 | Smax/Tm<br>axRac   | 0.806834 |
| Smax/Tm<br>axRaf        | 0.819634 | AreaShc           | 0.84128  | decay<br>ratebad   | 0.779393 |
| AreaLyn                 | 0.812357 | decay<br>rateRac  | 0.839855 | decay<br>rateSyk   | 0.762727 |
| decay<br>rateCam<br>KII | 0.787011 | decay<br>ratePyk2 | 0.797702 | AreaLyn            | 0.687019 |

| Apoptosis     |          | Proliferation |          | Cytokine secretion |          |
|---------------|----------|---------------|----------|--------------------|----------|
| AreaPLCg      | 0.754718 | Smax/TmaxPKD  | 0.792058 | AreaPLCg           | 0.666127 |
| decayratep85  | 0.73908  | decayratePKA  | 0.782491 | AreaCamKII         | 0.65298  |
| decayrateakt  | 0.72693  | AreaJAK       | 0.781392 | decayratep38       | 0.638816 |
| decayrateJAK  | 0.699494 | Smax/TmaxPKA  | 0.775035 | AreaPKD            | 0.603419 |
| Areap38       | 0.69606  | decayrateJNK  | 0.771048 | decayrateRac       | 0.516565 |
| AreaPyk2      | 0.620268 | AreaPKD       | 0.746455 | decayrateJAK       | 0.508252 |
| decayrateLyn  | 0.611024 | AreaPKCd      | 0.740828 | decayrateBLNK      | 0.442473 |
| Area Bad      | 0.605801 | Smax/Tmaxp38  | 0.709896 | Smax/TmaxJNK       | 0.435443 |
| decayratePKA  | 0.603995 | Area Bad      | 0.708291 | AreaPyk2           | 0.413686 |
| AreaERK       | 0.600833 | Smax/TmaxRac  | 0.698323 | Areap85            | 0.413675 |
| Smax/TmaxPyk2 | 0.584471 | Smax/TmaxPLCg | 0.69535  | decayratePKD       | 0.388072 |
| decayrateJNK  | 0.583417 | Areap38       | 0.694877 | Smax/TmaxERK       | 0.363997 |
| Smax/TmaxPKA  | 0.575646 | decayrateJAK  | 0.682896 | decayrateJNK       | 0.339172 |
| decayratePyk2 | 0.540636 | AreaJNK       | 0.6772   | decayratePKCd      | 0.278977 |
| decayratePKD  | 0.512131 | Smax/TmaxLyn  | 0.661155 | Areap38            | 0.275552 |
| decayratePLCg | 0.489846 | decayrateakt  | 0.65388  | decayratep85       | 0.256031 |
| AreaJAK       | 0.482896 | AreaERK       | 0.641591 | Smax/TmaxBcl2      | 0.220635 |
| Smax/Tmaxp38  | 0.479144 | decayratebad  | 0.576052 | decayratePyk2      | 0.218541 |
| decayrateShc  | 0.463192 | AreaPLCg      | 0.561519 | AreaPKA            | 0.207535 |
| Smax/TmaxLyn  | 0.460903 | decayrateShc  | 0.547926 | decayrateLyn       | 0.140969 |
| decayratebad  | 0.460344 | decayratep85  | 0.454097 | Smax/TmaxPKCd      | 0.12487  |
| Areap85       | 0.444229 | Areap85       | 0.446812 | Smax/TmaxPKA       | 0.08231  |
| AreaRac       | 0.440532 | AreaLyn       | 0.395717 | decayratePKA       | 0.058141 |
| AreaJNK       | 0.401657 | Smax/TmaxJNK  | 0.339772 | AreaJNK            | 0.008071 |

# Supplementary Figure S11: Cross validation of perfect specificity in the model

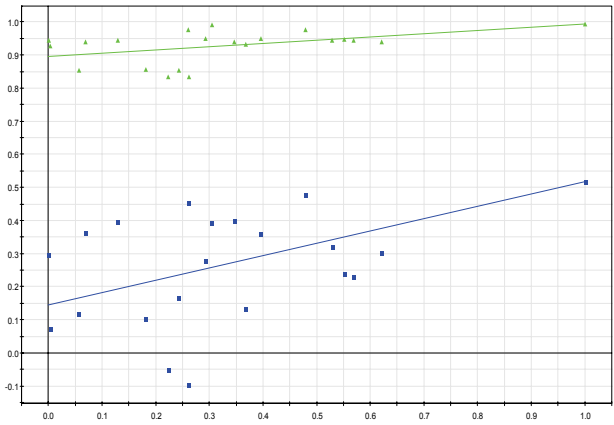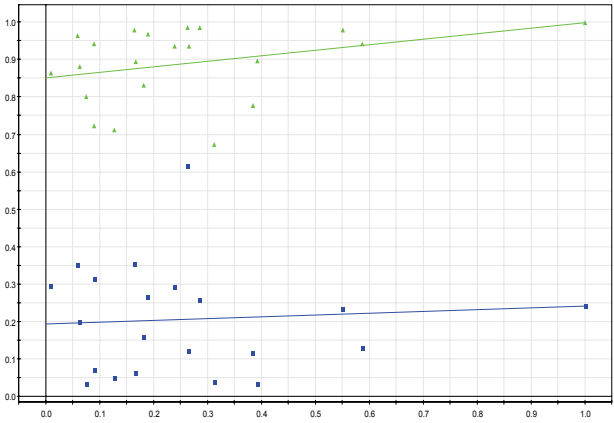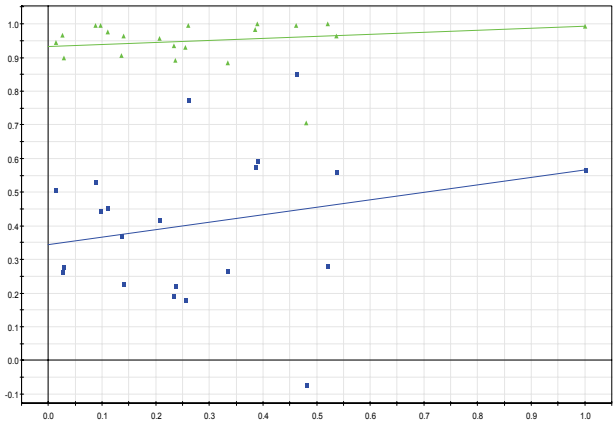

Each plot represents the cross validation by iteratively retraining the model parameters and then plotting the Q2 regression line. The plots clearly show that the model becomes invalid (since Q2 regression line never makes an intercept at y axis below zero as in the case of figure 3D) when perfect specificity is assumed due to lack of variability. As a result, no meaningful information is captured by the PLS model.

**Supplementary Table S12: Effect of pharmacological inhibitors on BCR-dependent signaling.**

Columns represent phosphorylation profiles of the individual molecules (mentioned at the beginning of each row) in the presence of the indicated pharmacological inhibitor. These values were obtained from Imagequant analysis of the Western blot experiments. One set of data is represented as a normalized profile obtained as described for Supplementary Figure S1 (Attached as separate excel sheet).

**Supplementary Table S13: Western Blot Data of all the 21 siRNA condition for each molecule along with replicates (Attached as separate excel sheet).**



**Supplementary Table S14: Table showing the list of siRNA and antibodies used for this study along with their sources and catalogue numbers.**

| S. No. | Name of the Molecule | siRNA (Cat No.)         | Antibody (Cat No.)               |
|--------|----------------------|-------------------------|----------------------------------|
| 1      | Akt1                 | SC-29196*               | SC-1618                          |
| 2      | Bad                  | SC- 29779               | SC-943                           |
| 3      | Bcl2                 | SC-29215                | SC-492                           |
| 4      | BLNK                 | SC-29811                | SC-15345                         |
| 5      | CaMKII $\alpha$      | SC-29901                | SC-9035                          |
| 6      | ERK1/2               | SC-29308, SC-35336      | SC-94, SC-154                    |
| 7      | Jak1                 | SC-35720                | 3332 (Cell Signaling Technology) |
| 8      | JNK1                 | SC-29381                | SC-474                           |
| 9      | Lyn                  | SC-35828                | SC-15                            |
| 10     | MEK1/2               | SC-35904, SC-35906      | SC-219, SC-525                   |
| 11     | p38 $\alpha$         | SC-29434                | SC-535                           |
| 12     | p85 $\alpha$         | SC-36218                | SC-1637                          |
| 13     | PKA $\alpha$         | SC-36241                | SC-903                           |
| 14     | PKC $\delta$         | SC-36246                | SC-213                           |
| 15     | PKD                  | SC-36260                | SC-639                           |
| 16     | PLC $\gamma$ 2       | SC-36269                | SC-407                           |
| 17     | Pyk2                 | SC-36333                | SC-9019                          |
| 18     | Rac1                 | SC-36352                | SC-95                            |
| 19     | Raf1                 | SC-29463                | SC-227                           |
| 20     | Shc                  | SC-29481                | SC-967                           |
| 21     | Syk                  | M_041084-00 (Dharmacon) | SC-1077                          |

\* All reagents from Santa Cruz Biotechnology, except for wherever mentioned otherwise

**Supplementary Table S 15: Data of Microarray experiment**

A: Mock Transfected

B: PLC $\gamma$  siRNA

C: PKC $\delta$  siRNA

D: CaMKII siRNA

E: Pyk2 siRNA

SLR: Signal Log Ratio

| Symbol                | Accession   | SLR A1 vs AC | SLR A2 vs AC | SLR A3 vs AC | SLR average |
|-----------------------|-------------|--------------|--------------|--------------|-------------|
| "Egr1"                | NM_007913.2 | 2.9          | 2.8          | 2.8          | 2.8         |
| "Egr2"                | NM_010118.1 | 2.1          | 1.8          | 1.9          | 1.9         |
| "Nfkbiz"              | NM_030612   | 1.8          | 1.7          | 1.9          | 1.8         |
| "Cd83"                | NM_009856.1 | 1.7          | 1.7          | 1.8          | 1.8         |
| "Traf1"               | NM_009421.2 | 1.5          | 1.5          | 1.5          | 1.5         |
| "Fos"                 | NM_010234.2 | 1.5          | 1.3          | 1.3          | 1.4         |
| "4930431E XM_207778.3 |             | 1.5          | 1.4          | 1.6          | 1.5         |
| "Ii4i1"               | NM_010215.1 | 1.5          | 1.4          | 1.4          | 1.4         |
| "Tnfaip3"             | NM_009397.2 | 1.5          | 1.1          | 1.3          | 1.3         |
| "Nfkbia"              | NM_010907   | 1.4          | 0.9          | 0.7          | 1.0         |
| "Cdkn2b"              | NM_007670.2 | 1.3          | 1.3          | 1.3          | 1.3         |
| "BC02453; NM_146237   |             | 1.3          | 1.4          | 1.3          | 1.3         |
| "AY07806; NM_172142.1 |             | 1.1          | 1.0          | 1.1          | 1.1         |
| "Bhlhb2"              | NM_011498.2 | 1.1          | 0.9          | 1.0          | 1.0         |
| "Cd69"                | XM_132882.1 | 1.1          | 1.3          | 1.1          | 1.2         |
| "Mmp10"               | NM_019471.1 | 1.0          | 1.0          | 1.0          | 1.0         |
| "Nfatc1"              | NM_016791.2 | 1.0          | 0.9          | 1.0          | 1.0         |
| "Pbef1"               | NM_021524.1 | 1.0          | 0.8          | 1.0          | 0.9         |
| "Junb"                | NM_008416.1 | 1.0          | 0.9          | 1.1          | 1.0         |
| "LOC3811; XM_355056.1 |             | 1.0          | 1.0          | 1.1          | 1.0         |
| "Nfkbie"              | NM_008690.2 | 0.8          | 0.9          | 1.0          | 0.9         |
| "Pcna"                | NM_011045.1 | 0.1          | -1.0         | -1.1         | -0.7        |
| "Cd24a"               | NM_009846.1 | -0.1         | -0.8         | -1.0         | -0.7        |
| "Slc3a2"              | NM_008577.2 | -0.2         | -1.1         | -1.2         | -0.8        |
| "2610041F NM_198008.1 |             | -0.3         | -0.9         | -1.0         | -0.8        |
| "LOC2346; XM_125126.3 |             | -0.6         | -0.7         | -1.0         | -0.8        |
| "mt-Nd5"              |             | -1.2         | -0.7         | -1.2         | -1.0        |

| Symbol                | Accession   | SLR B1 vs BC | SLR B2 vs BC | SLR B3 vs BC | SLR B3 re SLR average |     |
|-----------------------|-------------|--------------|--------------|--------------|-----------------------|-----|
| "Egr1"                | NM_007913.2 | 2.9          | 2.8          | 3.1          | 2.8                   | 2.9 |
| "Nfkbiz"              | NM_030612   | 1.7          | 1.6          | 1.7          | 1.5                   | 1.6 |
| "Egr2"                | NM_010118.1 | 1.7          | 1.7          | 1.8          | 1.5                   | 1.7 |
| "Cd83"                | NM_009856.1 | 1.6          | 1.4          | 1.3          | 1.5                   | 1.4 |
| "Junb"                | NM_008416.1 | 1.4          | 1.1          | 1.4          | 1.3                   | 1.3 |
| "Traf1"               | NM_009421.2 | 1.4          | 1.4          | 1.5          | 1.5                   | 1.5 |
| "Ii4i1"               | NM_010215.1 | 1.3          | 1.3          | 0.9          | 1.1                   | 1.2 |
| "4930431E XM_207778.3 |             | 1.3          | 1.3          | 1.2          | 1.3                   | 1.3 |
| "Tnfaip3"             | NM_009397.2 | 1.3          | 1.3          | 1.3          | 1.1                   | 1.2 |
| "BC02453; NM_146237   |             | 1.3          | 0.9          | 0.4          | 0.9                   | 0.9 |
| "LOC3811; XM_355056.1 |             | 1.2          | 1.1          | 1.0          | 1.0                   | 1.1 |
| "Cdkn2b"              | NM_007670.2 | 1.2          | 1.0          | 1.2          | 1.2                   | 1.1 |
| "Nfkbia"              | NM_010907   | 1.1          | 0.4          | 1.4          | 1.0                   | 1.0 |
| "Irf4"                | NM_013674.1 | 1.1          | 1.0          | 1.1          | 1.2                   | 1.1 |
| "AY07806; NM_172142.1 |             | 1.1          | 1.1          | 1.0          | 0.9                   | 1.0 |
| "Myc"                 | NM_010849.2 | 1.0          | 1.0          | 0.5          | 0.8                   | 0.8 |
| "Fos"                 | NM_010234.2 | 1.0          | 1.0          | 0.7          | 0.9                   | 0.9 |
| "Nfatc1"              | NM_016791.2 | 1.0          | 0.8          | 0.9          | 1.0                   | 0.9 |
| "Bhlhb2"              | NM_011498.2 | 1.0          | 0.8          | 1.1          | 0.9                   | 1.0 |
| "Nfatc1"              | NM_016791.2 | 1.0          | 0.9          | 1.1          | 1.0                   | 1.0 |
| "Dusp2"               | NM_010090.2 | 0.9          | 1.1          | 1.1          | 1.0                   | 1.0 |
| "Rabgef1"             | NM_019983.2 | 0.8          | 1.0          | 0.9          | 0.9                   | 0.9 |

| Symbol          | Accession   | SLR B1 vs BC | SLR B2 vs BC | SLR B3 vs BC | SLR B3 re SLR average |      |
|-----------------|-------------|--------------|--------------|--------------|-----------------------|------|
| "Gdap10"        | NM_010268.1 | 0.5          | 0.1          | 1.1          | 0.4                   | 0.5  |
| "LOC2447"       | XM_146826.2 | -0.2         | -1.2         | 0.1          | -0.4                  | -0.4 |
| "LOC2417"       | XM_141567.3 | -0.3         | -1.0         | 0.0          | -0.4                  | -0.4 |
| "Cct5"          | NM_007637.1 | -0.4         | -1.3         | -0.5         | -0.5                  | -0.7 |
| "LOC2147"       | XM_125109.2 | -0.5         | -1.0         | 0.0          | -0.5                  | -0.5 |
| "Atp5a1"        | NM_007505.1 | -0.5         | -1.2         | -0.3         | -0.6                  | -0.6 |
| "Ddx3x"         | NM_010028   | -0.5         | -1.0         | -0.3         | -0.5                  | -0.6 |
| "Mdh2"          | NM_008617.2 | -0.5         | -1.2         | -0.2         | -0.5                  | -0.6 |
| "LOC3845"       | XM_357690.1 | -0.5         | -1.2         | -0.1         | -0.4                  | -0.5 |
| "Ureb1"         | XM_136108   | -0.5         | -1.0         | -0.2         | -0.4                  | -0.5 |
| "2610041F"      | NM_198008.1 | -0.5         | -1.0         | 0.0          | -0.6                  | -0.6 |
| "Abcd3"         | NM_008991   | -0.5         | -1.1         | -0.1         | -0.4                  | -0.5 |
| "H3f3a"         | NM_008210.2 | -0.5         | -1.1         | -0.1         | -0.6                  | -0.6 |
| "Hnrpa2b1"      | NM_016806   | -0.6         | -1.1         | -0.3         | -0.7                  | -0.6 |
| "Dld"           | NM_007861.2 | -0.6         | -1.1         | 0.0          | -0.4                  | -0.5 |
| "Ndufb4"        | NM_026610.1 | -0.6         | -1.1         | -0.3         | -0.7                  | -0.7 |
| "Mrpl13"        | NM_026759.2 | -0.6         | -1.0         | -0.1         | -0.6                  | -0.6 |
| "Ctss"          | NM_021281.1 | -0.6         | -1.1         | -0.1         | -0.5                  | -0.6 |
| "Kpna3"         | NM_008466.2 | -0.6         | -1.1         | -0.2         | -0.6                  | -0.6 |
| "Hspa5"         | NM_022310.2 | -0.6         | -1.2         | 0.0          | -0.8                  | -0.6 |
| "1810030A06Rik" |             | -0.6         | -1.0         | 0.0          | -0.6                  | -0.5 |
| "Calm2"         | NM_007589   | -0.6         | -1.1         | -0.2         | -0.5                  | -0.6 |
| "Cryzl1"        | NM_133679.1 | -0.6         | -1.1         | -0.3         | -0.6                  | -0.6 |
| "Usmg5"         | XM_123431.1 | -0.6         | -1.2         | -0.4         | -0.8                  | -0.7 |
| "Ilgk-V1"       | XM_355776.1 | -0.6         | -1.1         | -0.1         | -0.6                  | -0.6 |
| "Bcat1"         | NM_007532   | -0.6         | -1.1         | -0.3         | -0.7                  | -0.7 |
| "Ube2e1"        | NM_009455.2 | -0.6         | -1.1         | -0.1         | -0.7                  | -0.6 |
| "Fin14"         |             | -0.6         | -1.1         | 0.1          | -0.7                  | -0.6 |
| "Hmgb1"         | NM_010439.2 | -0.6         | -1.5         | -0.2         | -0.7                  | -0.8 |
| "Ppp1cc"        | NM_013636.2 | -0.6         | -1.2         | -0.2         | -0.7                  | -0.7 |
| "Ndufa5"        | NM_026614.1 | -0.6         | -1.0         | -0.4         | -0.7                  | -0.7 |
| "Cspg6"         | NM_007790.2 | -0.7         | -1.1         | -0.2         | -0.6                  | -0.6 |
| "Rps6"          | NM_009096.1 | -0.7         | -1.2         | 0.0          | -0.5                  | -0.6 |
| "Prg"           | NM_011157.1 | -0.7         | -1.4         | 0.1          | -0.6                  | -0.6 |
| "Eif4g2"        | NM_013507.2 | -0.7         | -1.2         | -0.2         | -0.7                  | -0.7 |
| "Nono"          | NM_023144.1 | -0.7         | -1.0         | -0.4         | -0.7                  | -0.7 |
| "Cyfip2"        | XM_147526.1 | -0.7         | -1.1         | -0.1         | -0.8                  | -0.7 |
| "LOC2804"       | NM_183299   | -0.7         | -1.3         | -0.3         | -0.2                  | -0.6 |
| "Anp32a"        | NM_009672.2 | -0.7         | -1.1         | -0.2         | -0.7                  | -0.7 |
| "Ndufb5"        | NM_025316.2 | -0.7         | -1.1         | -0.2         | -0.5                  | -0.6 |
| "Slc25a4"       | XM_134169.4 | -0.7         | -1.4         | -0.1         | -0.7                  | -0.7 |
| "D11Ert6"       | NM_026023.3 | -0.7         | -1.1         | -0.1         | -0.6                  | -0.6 |
| "Vbp1"          | NM_011692.1 | -0.7         | -1.1         | -0.4         | -0.7                  | -0.7 |
| "Psm14"         | NM_021526   | -0.7         | -1.0         | -0.4         | -0.5                  | -0.6 |
| "Atp5l"         | XM_125157.1 | -0.8         | -1.4         | -0.3         | -0.7                  | -0.8 |
| "Slc3a2"        | NM_008577.2 | -0.8         | -1.3         | 0.3          | -0.6                  | -0.6 |
| "Vdac3"         | NM_011696.1 | -0.8         | -1.2         | 0.0          | -0.7                  | -0.7 |
| "1110005A"      | NM_025364   | -0.9         | -1.1         | -0.6         | -0.9                  | -0.9 |
| "Stmn1"         | NM_019641   | -0.9         | -1.4         | -0.5         | -0.9                  | -0.9 |
| "Atp5k"         | NM_007507   | -0.9         | -1.3         | -0.1         | -1.0                  | -0.8 |
| "Hmgn2"         | NM_016957.2 | -1.0         | -1.5         | -0.5         | -0.8                  | -0.9 |
| "Top1"          | NM_009408.1 | -1.0         | -1.4         | -0.4         | -1.0                  | -0.9 |
| "Pcna"          | NM_011045.1 | -1.0         | -1.7         | -0.2         | -1.2                  | -1.0 |
| "Rpl30"         | NM_009083.2 | -1.0         | -1.6         | -0.3         | -0.9                  | -1.0 |
| "LOC2358"       | XM_142431.1 | -1.1         | -1.5         | -0.8         | -1.3                  | -1.2 |
| "mt-Nd4l"       |             | -1.3         | -1.8         | -1.1         | -1.6                  | -1.5 |

| Symbol     | Accession   | SLR C1 vs CC | SLR C2 vs CC | SLR C3 vs CC | SLR C3rej | SLR average |
|------------|-------------|--------------|--------------|--------------|-----------|-------------|
| "Egr1"     | NM_007913.2 | 3.1          | 3.1          | 3.3          | 2.9       | 3.1         |
| "Egr2"     | NM_010118.1 | 2.0          | 2.1          | 2.2          | 2.0       | 2.1         |
| "Cd83"     | NM_009856.1 | 1.6          | 1.4          | 1.2          | 1.4       | 1.4         |
| "Nfkbiz"   | NM_030612   | 1.5          | 1.5          | 1.2          | 1.5       | 1.5         |
| "Il4i1"    | NM_010215.1 | 1.3          | 0.9          | 0.7          | 1.2       | 1.0         |
| "AY078066" | NM_172142.1 | 1.3          | 1.2          | 1.1          | 1.2       | 1.2         |
| "Tnfaip3"  | NM_009397.2 | 1.3          | 1.4          | 1.4          | 1.2       | 1.3         |
| "Junb"     | NM_008416.1 | 1.2          | 1.1          | 1.2          | 1.1       | 1.2         |
| "4930431E" | XM_207778.3 | 1.2          | 0.9          | 0.7          | 1.3       | 1.0         |
| "Nfkbia"   | NM_010907   | 1.2          | 1.7          | 2.0          | 0.9       | 1.5         |
| "Traf1"    | NM_009421.2 | 1.2          | 1.1          | 1.0          | 1.2       | 1.1         |
| "Irf4"     | NM_013674.1 | 1.0          | 0.8          | 0.8          | 1.1       | 0.9         |
| "Cdkn2b"   | NM_007670.2 | 1.0          | 1.1          | 1.2          | 1.0       | 1.1         |
| "Dusp2"    | NM_010090.2 | 1.0          | 0.8          | 0.8          | 1.0       | 0.9         |
| "Bhlhb2"   | NM_011498.2 | 0.9          | 1.3          | 1.1          | 0.9       | 1.1         |
| "Gdap10"   | NM_010268.1 | 0.7          | 1.4          | 1.5          | 0.5       | 1.0         |
| "Cox7b"    | NM_025379.1 | 0.3          | 0.9          | 1.1          | -0.1      | 0.6         |
| "Tdg"      | NM_172552.1 | 0.3          | 0.7          | 1.2          | 0.1       | 0.6         |
| "Twistnb"  | NM_172253.1 | 0.3          | 0.6          | 1.1          | -0.1      | 0.5         |
| "Slc3a2"   | NM_008577.2 | 0.2          | 1.4          | 1.9          | 0.0       | 0.9         |
| "H2-Aa"    | NM_010378.2 | 0.2          | 0.6          | 1.1          | 0.2       | 0.5         |
| "Rpo1-3"   | NM_181730.2 | 0.2          | 0.5          | 1.3          | 0.1       | 0.5         |
| "Map2k1"   | NM_008927.1 | 0.2          | 0.6          | 1.0          | 0.0       | 0.5         |
| "Pnpt1"    | NM_027869.1 | 0.2          | 0.5          | 1.1          | 0.0       | 0.4         |
| "Cita"     | NM_016760.1 | 0.2          | 1.0          | 1.3          | 0.0       | 0.6         |
| "A530089I" | NM_133999.1 | 0.2          | 0.3          | 1.1          | -0.1      | 0.4         |
| "1810011C" | NM_025456.2 | 0.1          | 0.7          | 1.2          | 0.0       | 0.5         |
| "Strn3"    | NM_052973   | 0.1          | 0.8          | 1.1          | 0.0       | 0.5         |
| "Hspa5"    | NM_022310.2 | 0.1          | 0.9          | 1.7          | -0.2      | 0.6         |
| "Idi1"     | NM_145360   | 0.1          | 0.8          | 1.1          | -0.1      | 0.5         |
| "Rpl30"    | NM_009083.2 | 0.1          | 0.8          | 1.4          | -0.4      | 0.5         |
| "Fin14"    |             | 0.1          | 0.9          | 1.6          | -0.1      | 0.6         |
| "AA95974z" | NM_133807.1 | 0.1          | 0.5          | 1.1          | -0.2      | 0.4         |
| "Ccrn4l"   | NM_009834.1 | 0.1          | 0.7          | 1.0          | 0.0       | 0.5         |
| "Ssfa1"    | XM_196564.2 | 0.1          | 0.9          | 1.2          | -0.1      | 0.5         |
| "1110005A" | NM_025364   | 0.1          | 0.9          | 1.0          | 0.0       | 0.5         |
| "BC02388"  | NM_146159.1 | 0.1          | 0.8          | 1.1          | -0.2      | 0.5         |
| "Ddx3x"    | NM_010028   | 0.0          | 0.6          | 1.0          | -0.4      | 0.3         |
| "Ccna2"    | NM_009828.1 | 0.0          | 0.4          | 1.0          | 0.1       | 0.4         |
| "Acsl4"    | NM_207625.1 | 0.0          | 1.0          | 1.1          | -0.1      | 0.5         |
| "2900064A" | NM_133749.1 | 0.0          | 0.6          | 1.3          | -0.1      | 0.5         |
| "Calm2"    | NM_007589   | 0.0          | 0.6          | 1.3          | -0.4      | 0.4         |
| "Ywhaz"    | NM_011740.2 | 0.0          | 0.5          | 1.2          | -0.1      | 0.4         |
| "Prg"      | NM_011157.1 | 0.0          | 1.1          | 1.7          | -0.1      | 0.7         |
| "Ube2c"    | NM_026785.1 | 0.0          | 0.1          | 1.0          | 0.0       | 0.3         |
| "Pcna"     | NM_011045.1 | 0.0          | 1.3          | 1.8          | -0.2      | 0.7         |
| "Rps6"     | NM_009096.1 | 0.0          | 0.7          | 1.3          | -0.3      | 0.4         |
| "Ndufv2"   | XM_128725   | 0.0          | 0.6          | 1.3          | -0.2      | 0.4         |
| "Snx5"     | NM_024225.2 | 0.0          | 0.7          | 1.3          | -0.1      | 0.5         |
| "Ube2e1"   | NM_009455.2 | 0.0          | 0.6          | 1.0          | -0.1      | 0.4         |
| "Sdfr1"    | NM_009145.1 | 0.0          | 0.5          | 1.0          | -0.2      | 0.3         |
| "Pbef1"    | NM_021524.1 | 0.0          | 0.4          | 1.0          | -0.1      | 0.3         |
| "E130112E" | AK053583    | 0.0          | 0.7          | 1.2          | -0.1      | 0.4         |
| "Atp5a1"   | NM_007505.1 | 0.0          | 0.7          | 1.2          | -0.2      | 0.4         |
| "Morf4l1"  | NM_024431   | 0.0          | 0.6          | 1.2          | -0.2      | 0.4         |
| "Bcat1"    | NM_007532   | 0.0          | 0.6          | 1.6          | -0.2      | 0.5         |
| "Atp5k"    | NM_007507   | 0.0          | 0.5          | 1.6          | -0.3      | 0.4         |
| "Vdac3"    | NM_011696.1 | 0.0          | 0.9          | 1.4          | -0.2      | 0.5         |

| Symbol          | Accession   | SLR C1 vs CC | SLR C2 vs CC | SLR C3 vs CC | SLR C3rej | SLR average |
|-----------------|-------------|--------------|--------------|--------------|-----------|-------------|
| "Paip2"         | NM_026420.1 | -0.1         | 0.7          | 1.2          | -0.1      | 0.4         |
| "Nup88"         | NM_172394.1 | -0.1         | 0.6          | 1.4          | -0.3      | 0.4         |
| "Rbm14"         | NM_019869.1 | -0.1         | 0.7          | 1.1          | -0.2      | 0.4         |
| "Arnt"          | AK037762    | -0.1         | 0.5          | 1.0          | -0.2      | 0.3         |
| "1110017C"      | NM_183250.1 | -0.1         | 0.6          | 1.1          | -0.1      | 0.4         |
| "Atp5l"         | XM_125157.1 | -0.1         | 0.9          | 1.7          | -0.3      | 0.6         |
| "Ga17"          | NM_145380.1 | -0.1         | 0.6          | 1.2          | -0.3      | 0.4         |
| "Adrbk1"        | NM_130863   | -0.1         | 0.2          | 1.1          | -0.2      | 0.3         |
| "Slc25a4"       | XM_134169.4 | -0.1         | 0.9          | 1.5          | -0.2      | 0.5         |
| "Trip12"        | NM_133975.2 | -0.1         | 0.3          | 1.1          | -0.2      | 0.3         |
| "LOC2365"       | XM_135705.3 | -0.1         | 0.5          | 1.0          | -0.2      | 0.3         |
| "mt-Nd4l"       |             | -0.1         | 1.1          | 2.1          | -0.2      | 0.7         |
| "Ddx39"         | NM_197982.2 | -0.1         | 0.6          | 1.1          | -0.2      | 0.3         |
| "Bmyc"          | NM_023326   | -0.1         | 0.6          | 1.0          | -0.2      | 0.3         |
| "LOC2346"       | XM_125126.3 | -0.1         | 0.4          | 1.1          | -0.4      | 0.3         |
| "1810030A06Rik" |             | -0.1         | 0.6          | 1.1          | -0.2      | 0.4         |
| "Hmgn2"         | NM_016957.2 | -0.1         | 0.7          | 1.6          | -0.3      | 0.5         |
| "Hnrpa2b1"      | NM_016806   | -0.1         | 0.6          | 1.1          | -0.4      | 0.3         |
| "Usmg5"         | XM_123431.1 | -0.1         | 0.7          | 1.3          | -0.4      | 0.4         |
| "Hmgb1"         | NM_010439.2 | -0.1         | 0.8          | 1.5          | -0.4      | 0.4         |
| "Dld"           | NM_007861.2 | -0.1         | 0.6          | 1.0          | -0.2      | 0.3         |
| "Cd24a"         | NM_009846.1 | -0.1         | 0.7          | 1.1          | -0.4      | 0.3         |
| "LOC3820"       | XM_356177.1 | -0.1         | 0.6          | 1.2          | -0.5      | 0.3         |
| "Ilgk-V1"       | XM_355776.1 | -0.1         | 0.6          | 1.2          | -0.2      | 0.4         |
| "LOC2076"       | XM_139845.1 | -0.1         | 0.3          | 1.2          | -0.2      | 0.3         |
| "LOC3812"       | XM_355183.1 | -0.2         | 0.7          | 1.2          | -0.3      | 0.3         |
| "Eif3s8"        | NM_019646.1 | -0.2         | 0.5          | 1.2          | -0.2      | 0.3         |
| "Cspg6"         | NM_007790.2 | -0.2         | 0.5          | 1.1          | -0.3      | 0.3         |
| "LOC3845"       | XM_357690.1 | -0.2         | 0.5          | 1.2          | -0.5      | 0.2         |
| "LOC3865"       | XM_359405.1 | -0.2         | 0.4          | 1.1          | -0.3      | 0.2         |
| "Top1"          | NM_009408.1 | -0.2         | 0.8          | 1.1          | -0.5      | 0.3         |
| "Eif4g2"        | NM_013507.2 | -0.2         | 0.6          | 1.3          | -0.3      | 0.3         |
| "LOC3818"       | XM_355862.1 | -0.2         | 0.2          | 1.1          | -0.4      | 0.2         |
| "LOC2147"       | XM_125109.2 | -0.3         | 0.6          | 1.1          | -0.6      | 0.2         |
| "LOC2447"       | XM_146826.2 | -0.5         | 0.5          | 1.4          | -0.7      | 0.2         |

| Symbol     | Accession   | SLR D1 vs DC | SLR D2 vs DC | SLR D3 vs DC | SLR D3rej | SLR average |
|------------|-------------|--------------|--------------|--------------|-----------|-------------|
| "Egr1"     | NM_007913.2 | 3.2          | 3.1          | 2.8          | 2.9       | 3.0         |
| "Nfkb1a"   | NM_010907   | 2.3          | 2.1          | 1.5          | 2.3       | 2.1         |
| "Egr2"     | NM_010118.1 | 2.3          | 1.9          | 1.9          | 2.2       | 2.1         |
| "Cd83"     | NM_009856.1 | 2.2          | 1.9          | 2.0          | 2.0       | 2.0         |
| "Nfkbiz"   | NM_030612   | 1.9          | 1.8          | 1.8          | 1.8       | 1.8         |
| "Tnfaip3"  | NM_009397.2 | 1.7          | 1.6          | 1.4          | 1.6       | 1.6         |
| "Hspa5"    | NM_022310.2 | 1.6          | 1.2          | 0.5          | 1.6       | 1.2         |
| "Prg"      | NM_011157.1 | 1.6          | 1.6          | 0.7          | 1.8       | 1.4         |
| "Atp5k"    | NM_007507   | 1.5          | 1.5          | 0.6          | 1.7       | 1.3         |
| "Hmgn2"    | NM_016957.2 | 1.5          | 1.3          | 0.5          | 1.6       | 1.2         |
| "Atp5l"    | XM_125157.1 | 1.5          | 1.2          | 0.4          | 1.5       | 1.1         |
| "Gdap10"   | NM_010268.1 | 1.4          | 1.4          | 0.6          | 1.4       | 1.2         |
| "Usmg5"    | XM_123431.1 | 1.4          | 1.2          | 0.5          | 1.3       | 1.1         |
| "Hmgb1"    | NM_010439.2 | 1.4          | 1.0          | 0.4          | 1.5       | 1.1         |
| "Il4i1"    | NM_010215.1 | 1.4          | 1.2          | 1.5          | 1.4       | 1.4         |
| "LOC2447"  | XM_146826.2 | 1.4          | 0.8          | 0.4          | 1.2       | 0.9         |
| "4930431E" | XM_207778.3 | 1.4          | 0.9          | 1.3          | 1.4       | 1.3         |
| "Pcna"     | NM_011045.1 | 1.3          | 1.4          | 0.3          | 1.6       | 1.1         |
| "Rpl30"    | NM_009083.2 | 1.3          | 1.2          | 0.4          | 1.6       | 1.1         |
| "Cdkn2b"   | NM_007670.2 | 1.3          | 1.3          | 1.2          | 1.3       | 1.3         |
| "Fos"      | NM_010234.2 | 1.3          | 1.5          | 1.4          | 1.4       | 1.4         |
| "LOC3812"  | XM_355183.1 | 1.3          | 1.0          | 0.5          | 1.2       | 1.0         |

| Symbol             | Accession   | SLR D1 vs DC | SLR D2 vs DC | SLR D3 vs DC | SLR D3rej | SLR average |
|--------------------|-------------|--------------|--------------|--------------|-----------|-------------|
| "Junb"             | NM_008416.1 | 1.3          | 1.0          | 1.2          | 1.1       | 1.1         |
| "Ndufb4"           | NM_026610.1 | 1.2          | 0.9          | 0.4          | 1.3       | 1.0         |
| "Dusp2"            | NM_010090.2 | 1.2          | 0.9          | 1.1          | 1.0       | 1.1         |
| "Rbm14"            | NM_019869.1 | 1.2          | 0.9          | 0.4          | 1.3       | 0.9         |
| "Nup88"            | NM_172394.1 | 1.2          | 0.9          | 0.3          | 1.4       | 1.0         |
| "LOC2147"          | XM_125109.2 | 1.2          | 0.9          | 0.4          | 1.0       | 0.9         |
| "Cox7b"            | NM_025379.1 | 1.2          | 0.9          | 0.3          | 1.2       | 0.9         |
| "Traf1"            | NM_009421.2 | 1.2          | 1.2          | 1.6          | 1.5       | 1.4         |
| "Ilgk-V1"          | XM_355776.1 | 1.2          | 1.1          | 0.5          | 1.3       | 1.0         |
| "Acsl4"            | NM_207625.1 | 1.2          | 1.2          | 0.4          | 1.2       | 1.0         |
| "Clta"             | NM_016760.1 | 1.2          | 1.1          | 0.3          | 1.1       | 0.9         |
| "Vdac3"            | NM_011696.1 | 1.2          | 1.0          | 0.1          | 1.0       | 0.8         |
| "Cdk5r1"           | NM_009871.2 | 1.1          | 1.2          | 0.9          | 1.1       | 1.1         |
| "Snx5"             | NM_024225.2 | 1.1          | 0.9          | 0.3          | 1.1       | 0.9         |
| "AY078065"         | NM_172142.1 | 1.1          | 1.2          | 1.2          | 1.2       | 1.2         |
| "Cd69"             | XM_132882.1 | 1.1          | 1.1          | 1.1          | 1.1       | 1.1         |
| "Rpl36a1"          | NM_025589.1 | 1.1          | 1.0          | 0.3          | 1.4       | 0.9         |
| "LOC2417"          | XM_141567.3 | 1.1          | 1.0          | 0.5          | 0.9       | 0.9         |
| "Nono"             | NM_023144.1 | 1.1          | 0.6          | 0.3          | 1.3       | 0.8         |
| "Calm2"            | NM_007589   | 1.1          | 0.7          | 0.3          | 1.2       | 0.8         |
| "LOC3820"          | XM_356177.1 | 1.1          | 0.9          | 0.3          | 1.1       | 0.9         |
| "Slc25a4"          | XM_134169.4 | 1.1          | 1.2          | 0.3          | 1.4       | 1.0         |
| "Eif4g2"           | NM_013507.2 | 1.1          | 0.8          | 0.2          | 1.2       | 0.8         |
| "Pbef1"            | NM_021524.1 | 1.1          | 1.1          | 0.4          | 1.2       | 1.0         |
| "Bcat1"            | NM_007532   | 1.1          | 0.9          | 0.3          | 1.1       | 0.9         |
| "Mdh2"             | NM_008617.2 | 1.1          | 0.8          | 0.4          | 1.2       | 0.9         |
| "Tuba1"            | NM_011653   | 1.1          | 0.8          | 0.3          | 1.3       | 0.9         |
| "H2-Aa"            | NM_010378.2 | 1.1          | 0.7          | 0.3          | 1.3       | 0.9         |
| "Idi1"             | NM_145360   | 1.1          | 0.8          | 0.3          | 1.1       | 0.8         |
| "LOC3815"          | XM_355538.1 | 1.1          | 0.8          | 0.5          | 0.9       | 0.8         |
| "Slc3a2"           | NM_008577.2 | 1.1          | 1.1          | 0.3          | 1.6       | 1.0         |
| "2610511C"         | NM_152817.2 | 1.0          | 1.0          | 0.2          | 1.1       | 0.8         |
| "LOC2365"          | XM_135705.3 | 1.0          | 0.9          | 0.5          | 0.9       | 0.8         |
| "E130112EAK053583" |             | 1.0          | 1.1          | 0.3          | 0.9       | 0.9         |
| "LOC2456"          | XM_142259.2 | 1.0          | 0.8          | 0.3          | 0.8       | 0.7         |
| "Ddx39"            | NM_197982.2 | 1.0          | 0.8          | 0.1          | 1.1       | 0.8         |
| "2900010J"         | NM_175190.2 | 1.0          | 0.7          | 0.3          | 1.0       | 0.8         |
| "mt-Nd4l"          |             | 1.0          | 1.3          | 0.1          | 1.3       | 0.9         |
| "1810011C"         | NM_025456.2 | 1.0          | 0.8          | 0.2          | 1.0       | 0.8         |
| "Ndufv2"           | XM_128725   | 1.0          | 0.6          | 0.2          | 1.0       | 0.7         |
| "Bhlhb2"           | NM_011498.2 | 1.0          | 1.4          | 1.2          | 1.3       | 1.2         |
| "2610205F"         | NM_027430.1 | 1.0          | 0.8          | 0.3          | 1.1       | 0.8         |
| "Rps6"             | NM_009096.1 | 1.0          | 1.1          | 0.3          | 1.3       | 0.9         |
| "Hnrpu"            | NM_016805.1 | 1.0          | 0.7          | 0.2          | 1.0       | 0.7         |
| "AA959742"         | NM_133807.1 | 1.0          | 1.1          | 0.3          | 1.1       | 0.8         |
| "Fin14"            |             | 1.0          | 0.9          | 0.2          | 1.3       | 0.8         |
| "Hprt"             | NM_013556.1 | 1.0          | 0.7          | 0.3          | 1.1       | 0.8         |
| "3300001M"         | NM_175113.1 | 0.9          | 0.7          | 0.3          | 1.1       | 0.7         |
| "ldb2"             | NM_010496.2 | 0.9          | 0.7          | 0.7          | 1.0       | 0.8         |
| "Stmn1"            | NM_019641   | 0.9          | 0.9          | 0.2          | 1.2       | 0.8         |
| "Cct5"             | NM_007637.1 | 0.9          | 0.7          | 0.2          | 1.0       | 0.7         |
| "2900064A"         | NM_133749.1 | 0.9          | 1.0          | 0.2          | 1.0       | 0.8         |
| "Eif3s8"           | NM_019646.1 | 0.9          | 1.0          | 0.4          | 1.0       | 0.8         |
| "Sdfr1"            | NM_009145.1 | 0.9          | 1.0          | 0.1          | 0.9       | 0.7         |
| "Slc11a1"          | NM_013612.1 | 0.9          | 0.7          | 0.3          | 1.1       | 0.7         |
| "Thy28"            | NM_144543.1 | 0.9          | 0.8          | 0.4          | 1.0       | 0.8         |
| "1110017C"         | NM_183250.1 | 0.9          | 0.8          | 0.3          | 1.2       | 0.8         |
| "LOC2804"          | NM_183299   | 0.9          | 0.1          | 0.1          | 1.1       | 0.6         |
| "Ndufb5"           | NM_025316.2 | 0.9          | 0.9          | 0.4          | 1.1       | 0.8         |

| Symbol     | Accession   | SLR D1 vs DC | SLR D2 vs DC | SLR D3 vs DC | SLR D3ref | SLR average |
|------------|-------------|--------------|--------------|--------------|-----------|-------------|
| "Cobb1"    | NM_033370   | 0.9          | 0.7          | 0.2          | 1.1       | 0.7         |
| "Ga17"     | NM_145380.1 | 0.8          | 0.7          | 0.3          | 1.3       | 0.8         |
| "Strn3"    | NM_052973   | 0.8          | 0.7          | 0.2          | 1.0       | 0.7         |
| "Nfatc1"   | NM_016791.2 | 0.8          | 0.8          | 0.9          | 1.1       | 0.9         |
| "BC02388"  | NM_146159.1 | 0.8          | 0.9          | 0.2          | 1.0       | 0.7         |
| "3110001"  | NM_026517.1 | 0.8          | 0.7          | 0.2          | 1.2       | 0.7         |
| "LOC3811"  | XM_355056.1 | 0.8          | 1.0          | 1.0          | 0.7       | 0.9         |
| "Gnb2-rs1" | NM_008143.2 | 0.8          | 0.6          | 0.5          | 1.0       | 0.7         |
| "Cd24a"    | NM_009846.1 | 0.8          | 0.7          | 0.3          | 1.2       | 0.7         |
| "D11Moh3"  | NM_172300   | 0.7          | 0.9          | 0.4          | 1.1       | 0.8         |
| "Tdg"      | NM_172552.1 | 0.7          | 0.4          | 0.1          | 1.0       | 0.6         |
| "Slc15a3"  | NM_023044.1 | 0.7          | 0.7          | 0.5          | 1.0       | 0.7         |
| "BC02453"  | NM_146237   | 0.7          | 0.6          | 1.0          | 1.0       | 0.8         |
| "Smu1"     | NM_021535.2 | 0.7          | 0.7          | 0.4          | 1.1       | 0.7         |
| "Ssfa1"    | XM_196564.2 | 0.7          | 0.7          | 0.1          | 1.0       | 0.6         |
| "D19Ert7"  | NM_029456.1 | 0.6          | 0.7          | 0.3          | 1.1       | 0.7         |
| "Birc3"    | NM_007464.1 | 0.6          | 0.7          | 0.4          | 1.0       | 0.7         |
| "Prg"      | NM_011157.1 | 0.6          | 0.8          | 0.8          | 1.0       | 0.8         |
| "Snx5"     | NM_024225.2 | 0.6          | 0.7          | 0.4          | 1.1       | 0.7         |
| "Hnrpa2b1" | NM_016806   | 0.5          | 0.8          | 0.1          | 1.1       | 0.6         |
| "Ndufa5"   | NM_026614.1 | 0.4          | 1.0          | 0.3          | 1.0       | 0.7         |

| Symbol     | Accession   | SLR E1 vs EC | SLR E2 vs EC | SLR E3 vs EC | SLR E3ref | SLR average |
|------------|-------------|--------------|--------------|--------------|-----------|-------------|
| "Egr1"     | NM_007913.2 | 2.4          | 3.0          | 3.2          | 3.2       | 2.9         |
| "Egr2"     | NM_010118.1 | 2.2          | 2.0          | 2.0          | 2.2       | 2.1         |
| "LOC3850"  | XM_358044.1 | 1.7          | 1.5          | 1.8          | 1.6       | 1.6         |
| "Nfkbiz"   | NM_030612   | 1.6          | 1.6          | 1.6          | 1.5       | 1.6         |
| "Cd83"     | NM_009856.1 | 1.6          | 1.5          | 1.6          | 1.4       | 1.5         |
| "Tnfaip3"  | NM_009397.2 | 1.4          | 1.2          | 1.1          | 1.3       | 1.2         |
| "Prpf8"    | NM_138659.1 | 1.3          | 1.1          | 1.2          | 1.2       | 1.2         |
| "Bhlhb2"   | NM_011498.2 | 1.3          |              |              |           | 1.3         |
| "Fos"      | NM_010234.2 | 1.2          | 1.5          | 1.4          | 1.5       | 1.4         |
| "2610510C" | NM_146130   | 1.2          | 1.2          | 1.3          | 1.3       | 1.2         |
| "4930431E" | XM_207778.3 | 1.2          | 1.3          | 1.3          | 1.3       | 1.3         |
| "AY078066" | NM_172142.1 | 1.2          | 1.2          | 1.0          | 1.2       | 1.1         |
| "Nfkbia"   | NM_010907   | 1.2          | 1.0          |              | 1.2       | 1.1         |
| "LOC3850"  | XM_358030.1 | 1.2          | 1.1          | 1.3          | 1.0       | 1.1         |
| "Cd69"     | XM_132882.1 | 1.1          | 1.2          | 1.1          | 1.1       | 1.1         |
| "Olf887"   | NM_146423.1 | 1.1          | 1.2          | 1.7          | 1.6       | 1.4         |
| "Gdap10"   | NM_010268.1 | 1.1          |              |              |           |             |
| "LOC3811"  | XM_355056.1 | 1.1          |              |              |           |             |
| "Pigt"     | NM_133779.1 | 1.1          |              | 1.1          | 1.2       | 1.1         |
| "Traf1"    | NM_009421.2 | 1.1          |              |              |           |             |
| "Il4i1"    | NM_010215.1 | 1.0          | 1.1          | 1.1          | 1.0       | 1.1         |
| "Slc16a6"  | NM_134038   | 1.0          |              | 1.0          |           | 1.0         |
| "Blr1"     | NM_007551.2 | 1.0          |              | 1.3          | 1.1       | 1.1         |
| "Ube4a"    | NM_145400   | 1.0          | 1.0          | 1.1          | 1.1       | 1.1         |
| "Got2"     | NM_010325.1 | 1.0          | 1.1          | 1.3          | 1.1       | 1.1         |
| "LOC3860"  | XM_359058.1 | 1.0          |              | 1.0          | 1.0       | 1.0         |
| "Bcl2l1"   | NM_009743.2 | 1.0          |              | 1.1          |           |             |
| "Junb"     | NM_008416.1 |              |              | 1.0          | 1.0       |             |
| "Nfatc1"   | NM_016791.2 |              |              |              | 1.1       |             |
| "BC02453"  | NM_146237   |              | 1.2          | 1.4          | 1.2       | 1.3         |
| "Pim1"     | NM_008842.2 |              | 1.1          | 1.1          |           | 1.1         |
| "Eef2"     | NM_007907.1 |              | 1.2          | 1.5          | 1.3       | 1.3         |
| "Slc4a7"   | XM_147798.4 |              |              |              | 1.0       |             |
| "2610305J" | AK011989    |              | 1.0          | 1.1          |           |             |
| "Csnk2a1"  | -AK031617   |              |              | 1.1          |           |             |

| Symbol     | Accession   | SLR E1 vs EC | SLR E2 vs EC | SLR E3 vs EC | SLR E3ref | SLR average |
|------------|-------------|--------------|--------------|--------------|-----------|-------------|
| "Ide"      | AK029089    |              |              | 1.3          |           |             |
| "Vars2"    | NM_011690.2 |              |              | 1.1          | 1.0       |             |
| "Raly"     | NM_023130.1 |              |              | 1.0          |           |             |
| "Zfp162"   | NM_011750.1 |              | 1.0          | 1.1          |           |             |
| "Hnrpk"    | NM_025279.1 |              | 1.1          | 1.1          | 1.0       | 1.1         |
| "Bcl2l1"   | NM_009743.2 |              | 1.0          | 1.0          |           |             |
| "Fosb"     | NM_008036   |              | 1.0          | 1.0          |           |             |
| "LOC3821"  | XM_356263.1 |              | 1.0          | 1.1          |           |             |
| "mt-Nd4l"  |             |              |              | -1.1         |           |             |
| "Cdkn2a"   | NM_009877.1 |              |              | 1.1          | 1.0       |             |
| "Eef2"     | NM_007907.1 |              |              | 1.1          |           |             |
| "Insig1"   | NM_153526.2 |              | 1.2          | 1.0          | 1.0       |             |
| "Slc3a2"   | NM_008577.2 |              |              | -1.2         |           |             |
| "Hmgb1"    | NM_010439.2 |              |              | -1.0         |           |             |
| "Pcna"     | NM_011045.1 |              | -1.2         | -1.4         |           |             |
| "Hmgn2"    | NM_016957.2 |              |              | -1.1         |           |             |
| "Rpl30"    | NM_009083.2 |              |              | -1.0         |           |             |
| "Nup88"    | NM_172394.1 |              |              | -1.1         |           |             |
| "Vdac3"    | NM_011696.1 |              | -1.0         | -1.2         |           |             |
| "1810008K" | NM_026929.2 | -1.1         |              | -0.2         |           |             |

C: Unstimulated  
1,2 and 3: Stimulated



**Supplementary Table S16: Data for the three cellular responses**

% Apoptotic Cells

|        | Cells | Fas | IgG+Fas |        | Cells | Fas | IgG+Fas |
|--------|-------|-----|---------|--------|-------|-----|---------|
| Akt    | 15    | 38  | 51      | Akt    | 13    | 33  | 48      |
| Bad    | 14    | 40  | 51      | Bad    | 11    | 39  | 51      |
| Bcl2   | 15    | 37  | 49      | Bcl2   | 12    | 36  | 48      |
| BLNK   | 22    | 67  | 66      | BLNK   | 25    | 71  | 65      |
| CaMKII | 19    | 57  | 39      | CaMKII | 19    | 60  | 38      |
| ERK    | 26    | 68  | 67      | ERK    | 30    | 74  | 69      |
| JAK    | 17    | 46  | 45      | JAK    | 19    | 41  | 45      |
| JNK    | 17    | 80  | 72      | JNK    | 17    | 80  | 74      |
| Lyn    | 29    | 77  | 72      | Lyn    | 33    | 80  | 76      |
| MEK    | 29    | 73  | 70      | MEK    | 25    | 73  | 70      |
| p38    | 18    | 75  | 71      | p38    | 11    | 70  | 66      |
| p85    | 17    | 74  | 71      | p85    | 12    | 72  | 70      |
| PKA    | 20    | 68  | 72      | PKA    | 22    | 67  | 70      |
| PKCd   | 6     | 49  | 36      | PKCd   | 8     | 44  | 32      |
| PKD    | 25    | 68  | 66      | PKD    | 25    | 71  | 66      |
| PLC    | 6     | 50  | 37      | PLC    | 5     | 49  | 38      |
| Rac    | 8     | 46  | 32      | Rac    | 10    | 50  | 35      |
| Raf    | 3     | 47  | 33      | Raf    | 1     | 41  | 34      |
| Shc    | 20    | 72  | 69      | Shc    | 17    | 70  | 69      |
| Syk    | 20    | 65  | 66      | Syk    | 20    | 67  | 67      |
| Nor    | 6     | 43  | 32      | Nor    | 4     | 46  | 30      |

Cytokine Secretion

|        | IL2 Secretion (pg per million cells) |          |          |          |        | IL2 Secretion (pg per million cells) |          |          |          |        | IL2 Secretion (pg per million cells) |          |          |          |
|--------|--------------------------------------|----------|----------|----------|--------|--------------------------------------|----------|----------|----------|--------|--------------------------------------|----------|----------|----------|
| Akt    | 30.84936                             | 149.4391 | 270.694  | 203.4366 | Akt    | 46.27404                             | 224.1587 | 311.2981 | 274.6394 | Akt    | 27.24359                             | 107.3718 | 216.3462 | 177.6175 |
| Bad    | 38.14799                             | 192.9087 | 217.2047 | 152.0694 | Bad    | 43.87019                             | 192.9087 | 152.0433 | 174.8798 | Bad    | 33.96739                             | 174.8798 | 212.0536 | 145.2759 |
| Bcl2   | 71.3141                              | 226.3622 | 203.125  | 147.929  | Bcl2   | 53.48558                             | 203.726  | 203.125  | 192.3077 | Bcl2   | 64.90385                             | 208.3333 | 200.1202 | 161.7973 |
| BLNK   | 28.04487                             | 65.6185  | 70.87202 | 82.84684 | BLNK   | 42.06731                             | 121.3942 | 102.7644 | 115.9856 | BLNK   | 12.01923                             | 63.34459 | 67.14191 | 71.68613 |
| CaMKII | 27.711                               | 92.42374 | 89.03134 | 85.59149 | CaMKII | 49.87981                             | 134.0144 | 120.1923 | 141.226  | CaMKII | 14.02244                             | 78.33223 | 94.81838 | 84.13462 |
| ERK    | 33.65385                             | 78.90886 | 93.29212 | 70.4764  | ERK    | 33.65385                             | 90.74519 | 97.95673 | 77.52404 | ERK    | 15.02404                             | 69.50251 | 86.99634 | 72.11538 |
| Jak    | 23.69505                             | 72.78312 | 103.1996 | 81.9493  | Jak    | 41.46635                             | 131.0096 | 149.6394 | 135.2163 | Jak    | 15.7967                              | 77.1234  | 104.8574 | 84.86305 |
| JNK    | 24.03846                             | 165.4412 | 154.533  | 131.7308 | JNK    | 32.45192                             | 140.625  | 162.2596 | 164.6635 | JNK    | 20.47721                             | 152.0079 | 164.2628 | 138.4615 |
| Lyn    | 35.16738                             | 138.8428 | 188.7464 | 118.5681 | Lyn    | 47.47596                             | 201.3221 | 254.8077 | 219.351  | Lyn    | 17.36111                             | 124.7513 | 177.6175 | 115.9693 |
| MEK    | 42.06731                             | 122.0901 | 78.58728 | 126.5182 | MEK    | 33.65385                             | 115.9856 | 102.1635 | 120.1923 | MEK    | 30.79928                             | 97.41903 | 73.9645  | 118.9271 |
| p38    | 45.40598                             | 109.5085 | 111.1779 | 89.74359 | p38    | 40.86538                             | 147.8365 | 133.4135 | 134.6154 | p38    | 32.05128                             | 104.1667 | 102.6643 | 88.94231 |
| p85    | 25.88757                             | 173.0769 | 180.8894 | 172.9724 | p85    | 33.65385                             | 173.0769 | 180.8894 | 198.9183 | p85    | 5.547337                             | 161.0577 | 186.2981 | 180.2885 |
| PKA    | 37.15035                             | 97.12838 | 149.2388 | 90.77682 | PKA    | 40.86538                             | 179.6875 | 179.0865 | 172.476  | PKA    | 15.2972                              | 89.33212 | 155.2484 | 91.72571 |
| PKCd   | 32.39967                             | 111.4887 | 111.9291 | 75.0469  | PKCd   | 37.25962                             | 161.6587 | 179.0865 | 153.8462 | PKCd   | 36.58027                             | 106.1008 | 112.6803 | 80.32364 |
| PKD    | 51.28205                             | 136.5041 | 210.7372 | 99.0676  | PKD    | 38.46154                             | 191.1058 | 158.0529 | 163.4615 | PKD    | 52.08333                             | 133.0701 | 229.1667 | 94.69697 |
| PLCg   | 32.92224                             | 83.65385 | 71.19083 | 69.8896  | PLCg   | 37.86058                             | 104.5673 | 92.54808 | 94.35096 | PLCg   | 30.83194                             | 76.92308 | 67.4926  | 68.99929 |
| Pyk2   | 45.07212                             | 169.9082 | 225.5373 | 111.6625 | Pyk2   | 45.07212                             | 186.899  | 191.7067 | 173.0769 | Pyk2   | 16.82692                             | 167.7229 | 219.8812 | 121.7432 |
| Rac    | 33.19597                             | 145.7985 | 159.413  | 166.6302 | Rac    | 34.85577                             | 167.6683 | 151.4423 | 183.2933 | Rac    | 20.6044                              | 151.0242 | 174.5951 | 163.8986 |
| Raf    | 58.37912                             | 139.3138 | 121.6346 | 93.03775 | Raf    | 40.86538                             | 153.2452 | 152.0433 | 125.601  | Raf    | 21.46291                             | 127.2946 | 112.5    | 84.13462 |
| Shc    | 37.95547                             | 193.109  | 130.5726 | 123.0769 | Shc    | 36.05769                             | 144.8317 | 143.6298 | 153.8462 | Shc    | 25.30364                             | 148.2372 | 91.78322 | 93.75    |
| Syk    | 32.19437                             | 143.75   | 84.13462 | 127.8846 | Syk    | 45.07212                             | 179.6875 | 126.2019 | 159.8558 | Syk    | 31.33585                             | 123.0769 | 75.72115 | 110.5769 |
| Nor    | 30.04808                             | 102.8312 | 159.6154 | 101.0188 | Nor    | 45.07212                             | 185.0962 | 199.5192 | 212.1394 | Nor    | 17.62821                             | 98.49092 | 157.6923 | 98.44322 |

Cell Proliferation

|        | IgG (12 Hr IgG(24 Hrs IgG(48 Hrs) |      |      |        | IgG (12 Hr IgG(24 Hrs IgG(48 Hrs) |      |      |
|--------|-----------------------------------|------|------|--------|-----------------------------------|------|------|
| Nor    | 4.3                               | 53.4 | 88.6 | Nor    | 2.3                               | 42.8 | 81.2 |
| Akt    | 10.9                              | 82.0 | 97.4 | Akt    | 9.6                               | 82.7 | 96.8 |
| Bad    | 5.5                               | 78.2 | 97.4 | Bad    | 7.1                               | 72.7 | 96.6 |
| Bcl2   | 4.6                               | 63.5 | 96.2 | Bcl2   | 5.2                               | 66.8 | 96.8 |
| BLNK   | 5.2                               | 48.0 | 87.6 | BLNK   | 1.5                               | 40.0 | 82.1 |
| CaMKII | 1.5                               | 29.3 | 88.4 | CaMKII | 1.0                               | 26.7 | 89.2 |
| ERK    | 5.0                               | 38.0 | 90.8 | ERK    | 4.0                               | 35.0 | 89.4 |
| JAK1   | 1.7                               | 49.5 | 93.9 | JAK1   | 1.0                               | 44.8 | 94.1 |
| JNK    | 5.6                               | 75.6 | 99.5 | JNK    | 7.5                               | 79.3 | 98.4 |
| Lyn    | 3.2                               | 54.0 | 98.7 | Lyn    | 2.1                               | 49.0 | 96.7 |
| MEK    | 1.0                               | 5.0  | 89.2 | MEK    | 0.2                               | 16.1 | 87.3 |
| p38    | 1.8                               | 44.7 | 96.9 | p38    | 2.0                               | 45.0 | 96.5 |
| p85    | 4.3                               | 63.0 | 99.2 | p85    | 3.4                               | 51.0 | 98.7 |
| PKA    | 4.6                               | 44.2 | 90.0 | PKA    | 1.1                               | 35.3 | 80.9 |
| PKD    | 0.3                               | 21.0 | 75.5 | PKD    | 0.1                               | 16.0 | 62.0 |
| PKCd   | 25.7                              | 72.9 | 79.3 | PKCd   | 22.0                              | 71.6 | 64.8 |
| PLC    | 35.0                              | 85.1 | 95.0 | PLC    | 34.8                              | 82.1 | 93.9 |
| Rac    | 42.5                              | 83.4 | 60.6 | Rac    | 40.0                              | 78.0 | 29.5 |
| Raf    | 54.8                              | 88.9 | 54.2 | Raf    | 57.4                              | 87.6 | 50.2 |
| Shc    | 1.3                               | 32.7 | 82.5 | Shc    | 0.6                               | 28.7 | 80.4 |
| Syk    | 1.0                               | 24.9 | 74.5 | Syk    | 0.4                               | 25.1 | 70.3 |
